# Supplementary material for: Identifying Where REDD+ Financially Out-Competes Oil Palm in Floodplain Landscapes Using a Fine-Scale Approach
Source: PLoS One. 2016 Jun 8;11(6):e0156481. doi: 10.1371/journal.pone.0156481 (PMC4898686; doi:10.1371/journal.pone.0156481)
Supplement: S1 File — Table A REDD+ economic model for 25 MgC/ha class; Tables B REDD+ economic model for 75 MgC/ha class; Tables C REDD+ economic model for 150 MgC/ha class; Tables D REDD+ economic model for 250 MgC/ha class; Tables E REDD+ economic model for 350 MgC/ha class; Tables F REDD+ economic model for 450 MgC/ha class; and, Tables G Coarse-scale models; Tables H sensitivity analyses at 5%, 8%, 11% and 14%, for each carbon classes mid-point MgC value at a hectare level. (XLSX) [file pone.0156481.s001.xlsx]

## Sheet: File S1
Supporting Information
File S3: Economic model sensitivity analyses outputs.
REDD+ financially out-competes oil palm cultivation in floodplain forest systems in Borneo
Nicola K. Abram*; Douglas C. MacMillan; Panteleimon Xofis; Marc Ancrenaz; Joseph Tzanopoulos; Robert Ong; Lian Pin Koh; Benoit Goossens; Christian Del Valle; Lucy Peter; Alexandra C Morel; Isabelle Lackman; Robin Chung; Harjinder Kler; Laurentius Ambu; William Baya; Andrew T. Knight.
*Corresponding author (nicola_abram@hotmail.com)

## Sheet: Table S1A_25 MgC
FULL UPFRONT PAYMENT
Table S1A REDD+ economic model for 25 MgC/ha class
REDD ECONOMIC MODEL (constant price)
Variables	Values
Area (ha)	1
On-site annual deforestation rate	1
Conversion period (years)	1
Discount rate	0.11
Rate of return on investment - rate of inflation
Ave forest biomass carbon (MgC/ha)	25
Ave oil palm biomass carbon (MgC/ha)	46
Net carbon savings through avoided deforestation (MgC/ha)	-21
Net carbon emission savings through avoided deforestation (MgCO2e/ha) (MgC/CO2e = 1/3.67 ratio)	-77.07
Annual appreciation for Carbon Financial Instruments (CFI)	0.05
REDD establishment cost ($/ha) (FIXED)	25
REDD annual running cost ($/ha) (FIXED)	10
REDD ECONOMIC MODEL OUTPUTS
Carbon pricing mechansim	NPV ($/ha25yr)	NPV ($/ha1yr)
Voluntary low case $3	-306.028	-12.2411
Voluntary mid case $7.8	-639.304	-25.5722
Voluntary high case $15	-1139.22	-45.5687
Full compliance $30	-2180.7	-87.2282
REDD (EA) MODELING DETAILS:
(1) AVOIDED EMISSIONS
Year	2011	2012	2013	2014	2015	2016	2017	2018	2019	2020	2021	2022	2023	2024	2025	2026	2027	2028	2029	2030	2031	2032	2033	2034	2035
Time since establishment (year)	1	2	3	4	5	6	7	8	9	10	11	12	13	14	15	16	17	18	19	20	21	22	23	24	25
Avoided emissions (MgCO2e)	-77.07	0	0	0	0	0	0	0	0	0	0	0	0	0	0	0	0	0	0	0	0	0	0	0	0
(2) CARBON PRICING MECHANISM
Year	2011	2012	2013	2014	2015	2016	2017	2018	2019	2020	2021	2022	2023	2024	2025	2026	2027	2028	2029	2030	2031	2032	2033	2034	2035
Time since establishment (year)	1	2	3	4	5	6	7	8	9	10	11	12	13	14	15	16	17	18	19	20	21	22	23	24	25
Voluntary low case $3	3	3	3	3	3	3	3	3	3	3	3	3	3	3	3	3	3	3	3	3	3	3	3	3	3
Voluntary mid case $7.8	7.8	7.8	7.8	7.8	7.8	7.8	7.8	7.8	7.8	7.8	7.8	7.8	7.8	7.8	7.8	7.8	7.8	7.8	7.8	7.8	7.8	7.8	7.8	7.8	7.8
Voluntary high case $15	15	15	15	15	15	15	15	15	15	15	15	15	15	15	15	15	15	15	15	15	15	15	15	15	15
Full compliance $30	30	30	30	30	30	30	30	30	30	30	30	30	30	30	30	30	30	30	30	30	30	30	30	30	30
(3) CARBON REVENUE
Year	2011	2012	2013	2014	2015	2016	2017	2018	2019	2020	2021	2022	2023	2024	2025	2026	2027	2028	2029	2030	2031	2032	2033	2034	2035
Time since establishment (year)	1	2	3	4	5	6	7	8	9	10	11	12	13	14	15	16	17	18	19	20	21	22	23	24	25
Voluntary low case $3	-231.21	0	0	0	0	0	0	0	0	0	0	0	0	0	0	0	0	0	0	0	0	0	0	0	0
Voluntary mid case $7.8	-601.146	0	0	0	0	0	0	0	0	0	0	0	0	0	0	0	0	0	0	0	0	0	0	0	0
Voluntary high case $15	-1156.05	0	0	0	0	0	0	0	0	0	0	0	0	0	0	0	0	0	0	0	0	0	0	0	0
Full compliance $30	-2312.1	0	0	0	0	0	0	0	0	0	0	0	0	0	0	0	0	0	0	0	0	0	0	0	0
(4) REDD COSTS
Year	2011	2012	2013	2014	2015	2016	2017	2018	2019	2020	2021	2022	2023	2024	2025	2026	2027	2028	2029	2030	2031	2032	2033	2034	2035
Time since establishment (year)	1	2	3	4	5	6	7	8	9	10	11	12	13	14	15	16	17	18	19	20	21	22	23	24	25
REDD development and maintenance costs ($)	25	10	10	10	10	10	10	10	10	10	10	10	10	10	10	10	10	10	10	10	10	10	10	10	10
(5) REDD PROFIT SCENARIOS
Year	2011	2012	2013	2014	2015	2016	2017	2018	2019	2020	2021	2022	2023	2024	2025	2026	2027	2028	2029	2030	2031	2032	2033	2034	2035
Time since establishment (year)	1	2	3	4	5	6	7	8	9	10	11	12	13	14	15	16	17	18	19	20	21	22	23	24	25
(5.1) Carbon profit ($)
Voluntary low case $3	-256.21	-10	-10	-10	-10	-10	-10	-10	-10	-10	-10	-10	-10	-10	-10	-10	-10	-10	-10	-10	-10	-10	-10	-10	-10
Voluntary mid case $7.8	-626.146	-10	-10	-10	-10	-10	-10	-10	-10	-10	-10	-10	-10	-10	-10	-10	-10	-10	-10	-10	-10	-10	-10	-10	-10
Voluntary high case $15	-1181.05	-10	-10	-10	-10	-10	-10	-10	-10	-10	-10	-10	-10	-10	-10	-10	-10	-10	-10	-10	-10	-10	-10	-10	-10
Full compliance $30	-2337.1	-10	-10	-10	-10	-10	-10	-10	-10	-10	-10	-10	-10	-10	-10	-10	-10	-10	-10	-10	-10	-10	-10	-10	-10
(5.2) REDD net present value (NPV) ($)
Voluntary low case $3	-230.82	-8.11622	-7.31191	-6.58731	-5.93451	-5.34641	-4.81658	-4.33926	-3.90925	-3.52184	-3.17283	-2.85841	-2.57514	-2.31995	-2.09004	-1.88292	-1.69633	-1.52822	-1.37678	-1.24034	-1.11742	-1.00669	-0.906925	-0.81705	-0.736081
Voluntary mid case $7.8	-564.095	-8.11622	-7.31191	-6.58731	-5.93451	-5.34641	-4.81658	-4.33926	-3.90925	-3.52184	-3.17283	-2.85841	-2.57514	-2.31995	-2.09004	-1.88292	-1.69633	-1.52822	-1.37678	-1.24034	-1.11742	-1.00669	-0.906925	-0.81705	-0.736081
Voluntary high case $15	-1064.01	-8.11622	-7.31191	-6.58731	-5.93451	-5.34641	-4.81658	-4.33926	-3.90925	-3.52184	-3.17283	-2.85841	-2.57514	-2.31995	-2.09004	-1.88292	-1.69633	-1.52822	-1.37678	-1.24034	-1.11742	-1.00669	-0.906925	-0.81705	-0.736081
Full compliance $30	-2105.5	-9.00901	-9.00901	-9.00901	-9.00901	-9.00901	-9.00901	-9.00901	-9.00901	-9.00901	-9.00901	-9.00901	-9.00901	-9.00901	-9.00901	-9.00901	-9.00901	-9.00901	-9.00901	-9.00901	-9.00901	-9.00901	-9.00901	-9.00901	-9.00901
(5.3) Net present value (NPV) accumulation ($)
Voluntary low case $3	-230.82	-238.936	-246.248	-252.835	-258.77	-264.116	-268.933	-273.272	-277.181	-277.181	-277.181	-277.181	-277.181	-277.181	-277.181	-277.181	-277.181	-277.181	-277.181	-277.181	-277.181	-277.181	-277.181	-277.181	-277.181
Voluntary mid case $7.8	-564.095	-572.212	-579.524	-586.111	-592.045	-597.392	-602.208	-606.548	-610.457	-610.457	-610.457	-610.457	-610.457	-610.457	-610.457	-610.457	-610.457	-610.457	-610.457	-610.457	-610.457	-610.457	-610.457	-610.457	-610.457
Voluntary high case $15	-1064.01	-1072.13	-1079.44	-1086.02	-1091.96	-1097.31	-1102.12	-1106.46	-1110.37	-1110.37	-1110.37	-1110.37	-1110.37	-1110.37	-1110.37	-1110.37	-1110.37	-1110.37	-1110.37	-1110.37	-1110.37	-1110.37	-1110.37	-1110.37	-1110.37
Full compliance $30	-2105.5	-2114.5	-2123.51	-2132.52	-2141.53	-2150.54	-2159.55	-2168.56	-2177.57	-2177.57	-2177.57	-2177.57	-2177.57	-2177.57	-2177.57	-2177.57	-2177.57	-2177.57	-2177.57	-2177.57	-2177.57	-2177.57	-2177.57	-2177.57	-2177.57
HALF UPFRONT PAYMENT WITH REMAINDER CONSTANT OVER 24 YEARS
Table S1A REDD+ economic model for 25 MgC/ha class
REDD ECONOMIC MODEL (constant price)
Variables	Values
Area (ha)	1
On-site annual deforestation rate	1
Percentage paid out in first year	0.5
Percentage paid out thereafter	0.020833
Conversion period (years)	1
Discount rate	0.11
Rate of return on investment - rate of inflation
Ave forest biomass carbon (MgC/ha)	25
Ave oil palm biomass carbon (MgC/ha)	46
Net carbon savings through avoided deforestation (MgC/ha)	-21
Net carbon emission savings through avoided deforestation (MgCO2e/ha) (MgC/CO2e = 1/3.67 ratio)	-77.07
Annual appreciation for Carbon Financial Instruments (CFI)	0.05
REDD establishment cost ($/ha) (FIXED)	25
REDD annual running cost ($/ha) (FIXED)	10
REDD ECONOMIC MODEL OUTPUTS
Carbon pricing mechansim	NPV ($/ha25yr)	NPV ($/ha1yr)
Voluntary low case $3	-238.106	-9.52424
Voluntary mid case $7.8	-462.706	-18.5082
Voluntary high case $15	-799.606	-31.9842
Full compliance $30	-1501.48	-60.0593
REDD (EA) MODELING DETAILS:
(1) AVOIDED EMISSIONS
Year	2011	2012	2013	2014	2015	2016	2017	2018	2019	2020	2021	2022	2023	2024	2025	2026	2027	2028	2029	2030	2031	2032	2033	2034	2035
Time since establishment (year)	1	2	3	4	5	6	7	8	9	10	11	12	13	14	15	16	17	18	19	20	21	22	23	24	25
Avoided emissions (MgCO2e)	-38.535	-1.6056	-1.6056	-1.6056	-1.6056	-1.6056	-1.6056	-1.6056	-1.6056	-1.6056	-1.6056	-1.6056	-1.6056	-1.6056	-1.6056	-1.6056	-1.6056	-1.6056	-1.6056	-1.6056	-1.6056	-1.6056	-1.6056	-1.6056	-1.6056
(2) CARBON PRICING MECHANISM
Year	2011	2012	2013	2014	2015	2016	2017	2018	2019	2020	2021	2022	2023	2024	2025	2026	2027	2028	2029	2030	2031	2032	2033	2034	2035
Time since establishment (year)	1	2	3	4	5	6	7	8	9	10	11	12	13	14	15	16	17	18	19	20	21	22	23	24	25
Voluntary low case $3	3	3	3	3	3	3	3	3	3	3	3	3	3	3	3	3	3	3	3	3	3	3	3	3	3
Voluntary mid case $7.8	7.8	7.8	7.8	7.8	7.8	7.8	7.8	7.8	7.8	7.8	7.8	7.8	7.8	7.8	7.8	7.8	7.8	7.8	7.8	7.8	7.8	7.8	7.8	7.8	7.8
Voluntary high case $15	15	15	15	15	15	15	15	15	15	15	15	15	15	15	15	15	15	15	15	15	15	15	15	15	15
Full compliance $30	30	30	30	30	30	30	30	30	30	30	30	30	30	30	30	30	30	30	30	30	30	30	30	30	30
(3) CARBON REVENUE
Year	2011	2012	2013	2014	2015	2016	2017	2018	2019	2020	2021	2022	2023	2024	2025	2026	2027	2028	2029	2030	2031	2032	2033	2034	2035
Time since establishment (year)	1	2	3	4	5	6	7	8	9	10	11	12	13	14	15	16	17	18	19	20	21	22	23	24	25
Voluntary low case $3	-115.605	-4.8168	-4.8168	-4.8168	-4.8168	-4.8168	-4.8168	-4.8168	-4.8168	-4.8168	-4.8168	-4.8168	-4.8168	-4.8168	-4.8168	-4.8168	-4.8168	-4.8168	-4.8168	-4.8168	-4.8168	-4.8168	-4.8168	-4.8168	-4.8168
Voluntary mid case $7.8	-300.573	-12.5237	-12.5237	-12.5237	-12.5237	-12.5237	-12.5237	-12.5237	-12.5237	-12.5237	-12.5237	-12.5237	-12.5237	-12.5237	-12.5237	-12.5237	-12.5237	-12.5237	-12.5237	-12.5237	-12.5237	-12.5237	-12.5237	-12.5237	-12.5237
Voluntary high case $15	-578.025	-24.084	-24.084	-24.084	-24.084	-24.084	-24.084	-24.084	-24.084	-24.084	-24.084	-24.084	-24.084	-24.084	-24.084	-24.084	-24.084	-24.084	-24.084	-24.084	-24.084	-24.084	-24.084	-24.084	-24.084
Full compliance $30	-1156.05	-48.168	-48.168	-48.168	-48.168	-48.168	-48.168	-48.168	-48.168	-48.168	-48.168	-48.168	-48.168	-48.168	-48.168	-48.168	-48.168	-48.168	-48.168	-48.168	-48.168	-48.168	-48.168	-48.168	-48.168
(4) REDD COSTS
Year	2011	2012	2013	2014	2015	2016	2017	2018	2019	2020	2021	2022	2023	2024	2025	2026	2027	2028	2029	2030	2031	2032	2033	2034	2035
Time since establishment (year)	1	2	3	4	5	6	7	8	9	10	11	12	13	14	15	16	17	18	19	20	21	22	23	24	25
REDD development and maintenance costs ($)	25	10	10	10	10	10	10	10	10	10	10	10	10	10	10	10	10	10	10	10	10	10	10	10	10
(5) REDD PROFIT SCENARIOS
Year	2011	2012	2013	2014	2015	2016	2017	2018	2019	2020	2021	2022	2023	2024	2025	2026	2027	2028	2029	2030	2031	2032	2033	2034	2035
Time since establishment (year)	1	2	3	4	5	6	7	8	9	10	11	12	13	14	15	16	17	18	19	20	21	22	23	24	25
(5.1) Carbon profit ($)
Voluntary low case $3	-140.605	-14.8168	-14.8168	-14.8168	-14.8168	-14.8168	-14.8168	-14.8168	-14.8168	-14.8168	-14.8168	-14.8168	-14.8168	-14.8168	-14.8168	-14.8168	-14.8168	-14.8168	-14.8168	-14.8168	-14.8168	-14.8168	-14.8168	-14.8168	-14.8168
Voluntary mid case $7.8	-325.573	-22.5237	-22.5237	-22.5237	-22.5237	-22.5237	-22.5237	-22.5237	-22.5237	-22.5237	-22.5237	-22.5237	-22.5237	-22.5237	-22.5237	-22.5237	-22.5237	-22.5237	-22.5237	-22.5237	-22.5237	-22.5237	-22.5237	-22.5237	-22.5237
Voluntary high case $15	-603.025	-34.084	-34.084	-34.084	-34.084	-34.084	-34.084	-34.084	-34.084	-34.084	-34.084	-34.084	-34.084	-34.084	-34.084	-34.084	-34.084	-34.084	-34.084	-34.084	-34.084	-34.084	-34.084	-34.084	-34.084
Full compliance $30	-1181.05	-58.168	-58.168	-58.168	-58.168	-58.168	-58.168	-58.168	-58.168	-58.168	-58.168	-58.168	-58.168	-58.168	-58.168	-58.168	-58.168	-58.168	-58.168	-58.168	-58.168	-58.168	-58.168	-58.168	-58.168
(5.2) REDD net present value (NPV) ($)
Voluntary low case $3	-126.671	-12.0256	-10.8339	-9.76028	-8.79305	-7.92167	-7.13664	-6.4294	-5.79225	-5.21825	-4.70112	-4.23525	-3.81554	-3.43742	-3.09678	-2.78989	-2.51341	-2.26434	-2.03994	-1.83779	-1.65566	-1.49159	-1.34377	-1.21061	-1.09064
Voluntary mid case $7.8	-293.309	-18.2807	-16.4691	-14.837	-13.3667	-12.0421	-10.8487	-9.77362	-8.80506	-7.93249	-7.14639	-6.43819	-5.80017	-5.22538	-4.70755	-4.24103	-3.82075	-3.44212	-3.10101	-2.7937	-2.51685	-2.26743	-2.04273	-1.8403	-1.65792
Voluntary high case $15	-543.266	-27.6633	-24.9219	-22.4522	-20.2272	-18.2227	-16.4168	-14.7899	-13.3243	-12.0039	-10.8143	-9.7426	-8.77711	-7.90731	-7.1237	-6.41775	-5.78176	-5.20879	-4.6926	-4.22757	-3.80862	-3.43119	-3.09116	-2.78483	-2.50886
Full compliance $30	-1064.01	-52.4036	-52.4036	-52.4036	-52.4036	-52.4036	-52.4036	-52.4036	-52.4036	-52.4036	-52.4036	-52.4036	-52.4036	-52.4036	-52.4036	-52.4036	-52.4036	-52.4036	-52.4036	-52.4036	-52.4036	-52.4036	-52.4036	-52.4036	-52.4036
(5.3) Net present value (NPV) accumulation ($)
Voluntary low case $3	-126.671	-138.697	-149.531	-159.291	-168.084	-176.006	-183.142	-189.572	-195.364	-195.364	-195.364	-195.364	-195.364	-195.364	-195.364	-195.364	-195.364	-195.364	-195.364	-195.364	-195.364	-195.364	-195.364	-195.364	-195.364
Voluntary mid case $7.8	-293.309	-311.59	-328.059	-342.896	-356.263	-368.305	-379.153	-388.927	-397.732	-397.732	-397.732	-397.732	-397.732	-397.732	-397.732	-397.732	-397.732	-397.732	-397.732	-397.732	-397.732	-397.732	-397.732	-397.732	-397.732
Voluntary high case $15	-543.266	-570.929	-595.851	-618.303	-638.53	-656.753	-673.17	-687.96	-701.284	-701.284	-701.284	-701.284	-701.284	-701.284	-701.284	-701.284	-701.284	-701.284	-701.284	-701.284	-701.284	-701.284	-701.284	-701.284	-701.284
Full compliance $30	-1064.01	-1116.41	-1168.82	-1221.22	-1273.62	-1326.03	-1378.43	-1430.83	-1483.24	-1483.24	-1483.24	-1483.24	-1483.24	-1483.24	-1483.24	-1483.24	-1483.24	-1483.24	-1483.24	-1483.24	-1483.24	-1483.24	-1483.24	-1483.24	-1483.24

## Sheet: Table S1B_75 MgC
FULL UPFRONT PAYMENT
Table S1B REDD+ economic model for 75 MgC/ha class
REDD ECONOMIC MODEL (constant price)
Variables	Values
Area (ha)	1
On-site annual deforestation rate	1
Conversion period (years)	0
Discount rate	0.11
Rate of return on investment - rate of inflation
Ave forest biomass carbon (MgC/ha)	75
Ave oil palm biomass carbon (MgC/ha)	46
Net carbon savings through avoided deforestation (MgC/ha)	29
Net carbon emission savings through avoided deforestation (MgCO2e/ha) (MgC/CO2e = 1/3.67 ratio)	106.43
Annual appreciation for Carbon Financial Instruments (CFI)	0.05
REDD establishment cost ($/ha) (FIXED)	25
REDD annual running cost ($/ha) (FIXED)	10
REDD ECONOMIC MODEL OUTPUTS
Carbon pricing mechansim	NPV ($/ha25yr)	NPV ($/ha1yr)
Voluntary low case $3	189.918	7.59671
Voluntary mid case $7.8	650.156	26.0062
Voluntary high case $15	1340.51	53.6205
Full compliance $30	2778.76	111.15
REDD (EA) MODELING DETAILS:
(1) AVOIDED EMISSIONS
Year	2011	2012	2013	2014	2015	2016	2017	2018	2019	2020	2021	2022	2023	2024	2025	2026	2027	2028	2029	2030	2031	2032	2033	2034	2035
Time since establishment (year)	1	2	3	4	5	6	7	8	9	10	11	12	13	14	15	16	17	18	19	20	21	22	23	24	25
Avoided emissions (MgCO2e)	106.43	0	0	0	0	0	0	0	0	0	0	0	0	0	0	0	0	0	0	0	0	0	0	0	0
(2) CARBON PRICING MECHANISM
Year	2011	2012	2013	2014	2015	2016	2017	2018	2019	2020	2021	2022	2023	2024	2025	2026	2027	2028	2029	2030	2031	2032	2033	2034	2035
Time since establishment (year)	1	2	3	4	5	6	7	8	9	10	11	12	13	14	15	16	17	18	19	20	21	22	23	24	25
Voluntary low case $3	3	3	3	3	3	3	3	3	3	3	3	3	3	3	3	3	3	3	3	3	3	3	3	3	3
Voluntary mid case $7.8	7.8	7.8	7.8	7.8	7.8	7.8	7.8	7.8	7.8	7.8	7.8	7.8	7.8	7.8	7.8	7.8	7.8	7.8	7.8	7.8	7.8	7.8	7.8	7.8	7.8
Voluntary high case $15	15	15	15	15	15	15	15	15	15	15	15	15	15	15	15	15	15	15	15	15	15	15	15	15	15
Full compliance $30	30	30	30	30	30	30	30	30	30	30	30	30	30	30	30	30	30	30	30	30	30	30	30	30	30
(3) CARBON REVENUE
Year	2011	2012	2013	2014	2015	2016	2017	2018	2019	2020	2021	2022	2023	2024	2025	2026	2027	2028	2029	2030	2031	2032	2033	2034	2035
Time since establishment (year)	1	2	3	4	5	6	7	8	9	10	11	12	13	14	15	16	17	18	19	20	21	22	23	24	25
Voluntary low case $3	319.29	0	0	0	0	0	0	0	0	0	0	0	0	0	0	0	0	0	0	0	0	0	0	0	0
Voluntary mid case $7.8	830.154	0	0	0	0	0	0	0	0	0	0	0	0	0	0	0	0	0	0	0	0	0	0	0	0
Voluntary high case $15	1596.45	0	0	0	0	0	0	0	0	0	0	0	0	0	0	0	0	0	0	0	0	0	0	0	0
Full compliance $30	3192.9	0	0	0	0	0	0	0	0	0	0	0	0	0	0	0	0	0	0	0	0	0	0	0	0
(4) REDD COSTS
Year	2011	2012	2013	2014	2015	2016	2017	2018	2019	2020	2021	2022	2023	2024	2025	2026	2027	2028	2029	2030	2031	2032	2033	2034	2035
Time since establishment (year)	1	2	3	4	5	6	7	8	9	10	11	12	13	14	15	16	17	18	19	20	21	22	23	24	25
REDD development and maintenance costs ($)	25	10	10	10	10	10	10	10	10	10	10	10	10	10	10	10	10	10	10	10	10	10	10	10	10
(5) REDD PROFIT SCENARIOS
Year	2011	2012	2013	2014	2015	2016	2017	2018	2019	2020	2021	2022	2023	2024	2025	2026	2027	2028	2029	2030	2031	2032	2033	2034	2035
Time since establishment (year)	1	2	3	4	5	6	7	8	9	10	11	12	13	14	15	16	17	18	19	20	21	22	23	24	25
(5.1) Carbon profit ($)
Voluntary low case $3	294.29	-10	-10	-10	-10	-10	-10	-10	-10	-10	-10	-10	-10	-10	-10	-10	-10	-10	-10	-10	-10	-10	-10	-10	-10
Voluntary mid case $7.8	805.154	-10	-10	-10	-10	-10	-10	-10	-10	-10	-10	-10	-10	-10	-10	-10	-10	-10	-10	-10	-10	-10	-10	-10	-10
Voluntary high case $15	1571.45	-10	-10	-10	-10	-10	-10	-10	-10	-10	-10	-10	-10	-10	-10	-10	-10	-10	-10	-10	-10	-10	-10	-10	-10
Full compliance $30	3167.9	-10	-10	-10	-10	-10	-10	-10	-10	-10	-10	-10	-10	-10	-10	-10	-10	-10	-10	-10	-10	-10	-10	-10	-10
(5.2) REDD net present value (NPV) ($)
Voluntary low case $3	265.126	-8.11622	-7.31191	-6.58731	-5.93451	-5.34641	-4.81658	-4.33926	-3.90925	-3.52184	-3.17283	-2.85841	-2.57514	-2.31995	-2.09004	-1.88292	-1.69633	-1.52822	-1.37678	-1.24034	-1.11742	-1.00669	-0.906925	-0.81705	-0.736081
Voluntary mid case $7.8	725.364	-8.11622	-7.31191	-6.58731	-5.93451	-5.34641	-4.81658	-4.33926	-3.90925	-3.52184	-3.17283	-2.85841	-2.57514	-2.31995	-2.09004	-1.88292	-1.69633	-1.52822	-1.37678	-1.24034	-1.11742	-1.00669	-0.906925	-0.81705	-0.736081
Voluntary high case $15	1415.72	-8.11622	-7.31191	-6.58731	-5.93451	-5.34641	-4.81658	-4.33926	-3.90925	-3.52184	-3.17283	-2.85841	-2.57514	-2.31995	-2.09004	-1.88292	-1.69633	-1.52822	-1.37678	-1.24034	-1.11742	-1.00669	-0.906925	-0.81705	-0.736081
Full compliance $30	2853.96	-9.00901	-9.00901	-9.00901	-9.00901	-9.00901	-9.00901	-9.00901	-9.00901	-9.00901	-9.00901	-9.00901	-9.00901	-9.00901	-9.00901	-9.00901	-9.00901	-9.00901	-9.00901	-9.00901	-9.00901	-9.00901	-9.00901	-9.00901	-9.00901
(5.3) Net present value (NPV) accumulation ($)
Voluntary low case $3	265.126	257.01	249.698	243.111	237.176	231.83	227.013	222.674	218.765	218.765	218.765	218.765	218.765	218.765	218.765	218.765	218.765	218.765	218.765	218.765	218.765	218.765	218.765	218.765	218.765
Voluntary mid case $7.8	725.364	717.248	709.936	703.349	697.414	692.068	687.251	682.912	679.002	679.002	679.002	679.002	679.002	679.002	679.002	679.002	679.002	679.002	679.002	679.002	679.002	679.002	679.002	679.002	679.002
Voluntary high case $15	1415.72	1407.6	1400.29	1393.71	1387.77	1382.42	1377.61	1373.27	1369.36	1369.36	1369.36	1369.36	1369.36	1369.36	1369.36	1369.36	1369.36	1369.36	1369.36	1369.36	1369.36	1369.36	1369.36	1369.36	1369.36
Full compliance $30	2853.96	2844.95	2835.95	2826.94	2817.93	2808.92	2799.91	2790.9	2781.89	2781.89	2781.89	2781.89	2781.89	2781.89	2781.89	2781.89	2781.89	2781.89	2781.89	2781.89	2781.89	2781.89	2781.89	2781.89	2781.89
HALF UPFRONT PAYMENT WITH REMAINDER CONSTANT OVER 24 YEARS
Table S1B REDD+ economic model for 75 MgC/ha class
REDD ECONOMIC MODEL (constant price)
Variables	Values
Area (ha)	1
On-site annual deforestation rate	1
Percentage paid out in first year	0.5
Percentage paid out thereafter	0.020833
Discount rate	0.11
Rate of return on investment - rate of inflation
Ave forest biomass carbon (MgC/ha)	75
Ave oil palm biomass carbon (MgC/ha)	46
Net carbon savings through avoided deforestation (MgC/ha)	29
Net carbon emission savings through avoided deforestation (MgCO2e/ha) (MgC/CO2e = 1/3.67 ratio)	106.43
Annual appreciation for Carbon Financial Instruments (CFI)	0.05
REDD establishment cost ($/ha) (FIXED)	25
REDD annual running cost ($/ha) (FIXED)	10
REDD ECONOMIC MODEL OUTPUTS
Carbon pricing mechansim	NPV ($/ha25yr)	NPV ($/ha1yr)
Voluntary low case $3	96.1203	3.84481
Voluntary mid case $7.8	406.282	16.2513
Voluntary high case $15	871.525	34.861
Full compliance $30	1840.78	73.6313
REDD (EA) MODELING DETAILS:
(1) AVOIDED EMISSIONS
Year	2011	2012	2013	2014	2015	2016	2017	2018	2019	2020	2021	2022	2023	2024	2025	2026	2027	2028	2029	2030	2031	2032	2033	2034	2035
Time since establishment (year)	1	2	3	4	5	6	7	8	9	10	11	12	13	14	15	16	17	18	19	20	21	22	23	24	25
Avoided emissions (MgCO2e)	53.215	2.21726	2.21726	2.21726	2.21726	2.21726	2.21726	2.21726	2.21726	2.21726	2.21726	2.21726	2.21726	2.21726	2.21726	2.21726	2.21726	2.21726	2.21726	2.21726	2.21726	2.21726	2.21726	2.21726	2.21726
(2) CARBON PRICING MECHANISM
Year	2011	2012	2013	2014	2015	2016	2017	2018	2019	2020	2021	2022	2023	2024	2025	2026	2027	2028	2029	2030	2031	2032	2033	2034	2035
Time since establishment (year)	1	2	3	4	5	6	7	8	9	10	11	12	13	14	15	16	17	18	19	20	21	22	23	24	25
Voluntary low case $3	3	3	3	3	3	3	3	3	3	3	3	3	3	3	3	3	3	3	3	3	3	3	3	3	3
Voluntary mid case $7.8	7.8	7.8	7.8	7.8	7.8	7.8	7.8	7.8	7.8	7.8	7.8	7.8	7.8	7.8	7.8	7.8	7.8	7.8	7.8	7.8	7.8	7.8	7.8	7.8	7.8
Voluntary high case $15	15	15	15	15	15	15	15	15	15	15	15	15	15	15	15	15	15	15	15	15	15	15	15	15	15
Full compliance $30	30	30	30	30	30	30	30	30	30	30	30	30	30	30	30	30	30	30	30	30	30	30	30	30	30
(3) CARBON REVENUE
Year	2011	2012	2013	2014	2015	2016	2017	2018	2019	2020	2021	2022	2023	2024	2025	2026	2027	2028	2029	2030	2031	2032	2033	2034	2035
Time since establishment (year)	1	2	3	4	5	6	7	8	9	10	11	12	13	14	15	16	17	18	19	20	21	22	23	24	25
Voluntary low case $3	159.645	6.65177	6.65177	6.65177	6.65177	6.65177	6.65177	6.65177	6.65177	6.65177	6.65177	6.65177	6.65177	6.65177	6.65177	6.65177	6.65177	6.65177	6.65177	6.65177	6.65177	6.65177	6.65177	6.65177	6.65177
Voluntary mid case $7.8	415.077	17.2946	17.2946	17.2946	17.2946	17.2946	17.2946	17.2946	17.2946	17.2946	17.2946	17.2946	17.2946	17.2946	17.2946	17.2946	17.2946	17.2946	17.2946	17.2946	17.2946	17.2946	17.2946	17.2946	17.2946
Voluntary high case $15	798.225	33.2588	33.2588	33.2588	33.2588	33.2588	33.2588	33.2588	33.2588	33.2588	33.2588	33.2588	33.2588	33.2588	33.2588	33.2588	33.2588	33.2588	33.2588	33.2588	33.2588	33.2588	33.2588	33.2588	33.2588
Full compliance $30	1596.45	66.5177	66.5177	66.5177	66.5177	66.5177	66.5177	66.5177	66.5177	66.5177	66.5177	66.5177	66.5177	66.5177	66.5177	66.5177	66.5177	66.5177	66.5177	66.5177	66.5177	66.5177	66.5177	66.5177	66.5177
(4) REDD COSTS
Year	2011	2012	2013	2014	2015	2016	2017	2018	2019	2020	2021	2022	2023	2024	2025	2026	2027	2028	2029	2030	2031	2032	2033	2034	2035
Time since establishment (year)	1	2	3	4	5	6	7	8	9	10	11	12	13	14	15	16	17	18	19	20	21	22	23	24	25
REDD development and maintenance costs ($)	25	10	10	10	10	10	10	10	10	10	10	10	10	10	10	10	10	10	10	10	10	10	10	10	10
(5) REDD PROFIT SCENARIOS
Year	2011	2012	2013	2014	2015	2016	2017	2018	2019	2020	2021	2022	2023	2024	2025	2026	2027	2028	2029	2030	2031	2032	2033	2034	2035
Time since establishment (year)	1	2	3	4	5	6	7	8	9	10	11	12	13	14	15	16	17	18	19	20	21	22	23	24	25
(5.1) Carbon profit ($)
Voluntary low case $3	134.645	-3.34823	-3.34823	-3.34823	-3.34823	-3.34823	-3.34823	-3.34823	-3.34823	-3.34823	-3.34823	-3.34823	-3.34823	-3.34823	-3.34823	-3.34823	-3.34823	-3.34823	-3.34823	-3.34823	-3.34823	-3.34823	-3.34823	-3.34823	-3.34823
Voluntary mid case $7.8	390.077	7.2946	7.2946	7.2946	7.2946	7.2946	7.2946	7.2946	7.2946	7.2946	7.2946	7.2946	7.2946	7.2946	7.2946	7.2946	7.2946	7.2946	7.2946	7.2946	7.2946	7.2946	7.2946	7.2946	7.2946
Voluntary high case $15	773.225	23.2588	23.2588	23.2588	23.2588	23.2588	23.2588	23.2588	23.2588	23.2588	23.2588	23.2588	23.2588	23.2588	23.2588	23.2588	23.2588	23.2588	23.2588	23.2588	23.2588	23.2588	23.2588	23.2588	23.2588
Full compliance $30	1571.45	56.5177	56.5177	56.5177	56.5177	56.5177	56.5177	56.5177	56.5177	56.5177	56.5177	56.5177	56.5177	56.5177	56.5177	56.5177	56.5177	56.5177	56.5177	56.5177	56.5177	56.5177	56.5177	56.5177	56.5177
(5.2) REDD net present value (NPV) ($)
Voluntary low case $3	121.302	-2.7175	-2.4482	-2.20558	-1.98701	-1.7901	-1.6127	-1.45289	-1.30891	-1.1792	-1.06234	-0.957061	-0.862217	-0.776772	-0.699795	-0.630446	-0.567969	-0.511684	-0.460977	-0.415294	-0.374139	-0.337062	-0.30366	-0.273567	-0.246457
Voluntary mid case $7.8	351.421	6.57171	5.33375	4.80518	4.32899	3.89999	3.5135	3.16532	2.85164	2.56904	2.31445	2.08509	1.87846	1.69231	1.5246	1.37352	1.2374	1.11478	1.0043	0.904778	0.815115	0.734338	0.661566	0.596005	0.536941
Voluntary high case $15	696.599	20.9539	17.0067	15.3213	13.803	12.4351	11.2028	10.0926	9.09246	8.1914	7.37964	6.64833	5.98948	5.39593	4.8612	4.37946	3.94546	3.55447	3.20222	2.88489	2.599	2.34144	2.1094	1.90036	1.71204
Full compliance $30	1415.72	45.871	41.3252	37.23	33.5405	30.2167	27.2222	24.5245	22.0942	19.9047	17.9321	16.1551	14.5541	13.1118	11.8124	10.6418	9.58724	8.63716	7.78122	7.01011	6.31541	5.68956	5.12573	4.61778	4.16016
(5.3) Net present value (NPV) accumulation ($)
Voluntary low case $3	121.302	118.584	116.136	113.931	111.944	110.153	108.541	107.088	105.779	104.6	103.537	102.58	101.718	100.941	100.242	99.6111	99.0431	98.5314	98.0705	97.6552	97.281	96.944	96.6403	96.3667	96.1203
Voluntary mid case $7.8	351.421	357.992	363.326	368.131	372.46	376.36	379.874	383.039	385.891	388.46	390.774	392.859	394.738	396.43	397.955	399.328	400.566	401.68	402.685	403.59	404.405	405.139	405.801	406.397	406.934
Voluntary high case $15	696.599	717.553	734.56	749.881	763.684	776.119	787.322	797.415	806.507	814.698	822.078	828.726	834.716	840.112	844.973	849.352	853.298	856.852	860.055	862.939	865.538	867.88	869.989	871.89	873.602
Full compliance $30	1415.72	1461.59	1502.92	1540.15	1573.69	1603.9	1631.13	1655.65	1677.74	1697.65	1715.58	1731.74	1746.29	1759.4	1771.22	1781.86	1791.44	1800.08	1807.86	1814.87	1821.19	1826.88	1832	1836.62	1840.78

## Sheet: Table S1C_ 150 MgC
FULL UPFRONT PAYMENT
Table S1C REDD+ economic model for 150 MgC/ha class
REDD ECONOMIC MODEL (constant price)
Variables	Values
Area (ha)	1
On-site annual deforestation rate	1
Conversion period (years)	0
Discount rate	0.11
Rate of return on investment - rate of inflation
Ave forest biomass carbon (MgC/ha)	150
Ave oil palm biomass carbon (MgC/ha)	46
Net carbon savings through avoided deforestation (MgC/ha)	104
Net carbon emission savings through avoided deforestation (MgCO2e/ha) (MgC/CO2e = 1/3.67 ratio)	381.68
Annual appreciation for Carbon Financial Instruments (CFI)	0.05
REDD establishment cost ($/ha) (FIXED)	25
REDD annual running cost ($/ha) (FIXED)	10
REDD ECONOMIC MODEL OUTPUTS
Carbon pricing mechansim	NPV ($/ha25yr)	NPV ($/ha1yr)
Voluntary low case $3	933.837	37.3535
Voluntary mid case $7.8	2584.34	103.374
Voluntary high case $15	5060.11	202.404
Full compliance $30	10217.9	408.718
REDD (EA) MODELING DETAILS:
(1) AVOIDED EMISSIONS
Year	2011	2012	2013	2014	2015	2016	2017	2018	2019	2020	2021	2022	2023	2024	2025	2026	2027	2028	2029	2030	2031	2032	2033	2034	2035
Time since establishment (year)	1	2	3	4	5	6	7	8	9	10	11	12	13	14	15	16	17	18	19	20	21	22	23	24	25
Avoided emissions (MgCO2e)	381.68	0	0	0	0	0	0	0	0	0	0	0	0	0	0	0	0	0	0	0	0	0	0	0	0
(2) CARBON PRICING MECHANISM
Year	2011	2012	2013	2014	2015	2016	2017	2018	2019	2020	2021	2022	2023	2024	2025	2026	2027	2028	2029	2030	2031	2032	2033	2034	2035
Time since establishment (year)	1	2	3	4	5	6	7	8	9	10	11	12	13	14	15	16	17	18	19	20	21	22	23	24	25
Voluntary low case $3	3	3	3	3	3	3	3	3	3	3	3	3	3	3	3	3	3	3	3	3	3	3	3	3	3
Voluntary mid case $7.8	7.8	7.8	7.8	7.8	7.8	7.8	7.8	7.8	7.8	7.8	7.8	7.8	7.8	7.8	7.8	7.8	7.8	7.8	7.8	7.8	7.8	7.8	7.8	7.8	7.8
Voluntary high case $15	15	15	15	15	15	15	15	15	15	15	15	15	15	15	15	15	15	15	15	15	15	15	15	15	15
Full compliance $30	30	30	30	30	30	30	30	30	30	30	30	30	30	30	30	30	30	30	30	30	30	30	30	30	30
(3) CARBON REVENUE
Year	2011	2012	2013	2014	2015	2016	2017	2018	2019	2020	2021	2022	2023	2024	2025	2026	2027	2028	2029	2030	2031	2032	2033	2034	2035
Time since establishment (year)	1	2	3	4	5	6	7	8	9	10	11	12	13	14	15	16	17	18	19	20	21	22	23	24	25
Voluntary low case $3	1145.04	0	0	0	0	0	0	0	0	0	0	0	0	0	0	0	0	0	0	0	0	0	0	0	0
Voluntary mid case $7.8	2977.1	0	0	0	0	0	0	0	0	0	0	0	0	0	0	0	0	0	0	0	0	0	0	0	0
Voluntary high case $15	5725.2	0	0	0	0	0	0	0	0	0	0	0	0	0	0	0	0	0	0	0	0	0	0	0	0
Full compliance $30	11450.4	0	0	0	0	0	0	0	0	0	0	0	0	0	0	0	0	0	0	0	0	0	0	0	0
(4) REDD COSTS
Year	2011	2012	2013	2014	2015	2016	2017	2018	2019	2020	2021	2022	2023	2024	2025	2026	2027	2028	2029	2030	2031	2032	2033	2034	2035
Time since establishment (year)	1	2	3	4	5	6	7	8	9	10	11	12	13	14	15	16	17	18	19	20	21	22	23	24	25
REDD development and maintenance costs ($)	25	10	10	10	10	10	10	10	10	10	10	10	10	10	10	10	10	10	10	10	10	10	10	10	10
(5) REDD PROFIT SCENARIOS
Year	2011	2012	2013	2014	2015	2016	2017	2018	2019	2020	2021	2022	2023	2024	2025	2026	2027	2028	2029	2030	2031	2032	2033	2034	2035
Time since establishment (year)	1	2	3	4	5	6	7	8	9	10	11	12	13	14	15	16	17	18	19	20	21	22	23	24	25
(5.1) Carbon profit ($)
Voluntary low case $3	1120.04	-10	-10	-10	-10	-10	-10	-10	-10	-10	-10	-10	-10	-10	-10	-10	-10	-10	-10	-10	-10	-10	-10	-10	-10
Voluntary mid case $7.8	2952.1	-10	-10	-10	-10	-10	-10	-10	-10	-10	-10	-10	-10	-10	-10	-10	-10	-10	-10	-10	-10	-10	-10	-10	-10
Voluntary high case $15	5700.2	-10	-10	-10	-10	-10	-10	-10	-10	-10	-10	-10	-10	-10	-10	-10	-10	-10	-10	-10	-10	-10	-10	-10	-10
Full compliance $30	11425.4	-10	-10	-10	-10	-10	-10	-10	-10	-10	-10	-10	-10	-10	-10	-10	-10	-10	-10	-10	-10	-10	-10	-10	-10
(5.2) REDD net present value (NPV) ($)
Voluntary low case $3	1009.05	-8.11622	-7.31191	-6.58731	-5.93451	-5.34641	-4.81658	-4.33926	-3.90925	-3.52184	-3.17283	-2.85841	-2.57514	-2.31995	-2.09004	-1.88292	-1.69633	-1.52822	-1.37678	-1.24034	-1.11742	-1.00669	-0.906925	-0.81705	-0.736081
Voluntary mid case $7.8	2659.55	-8.11622	-7.31191	-6.58731	-5.93451	-5.34641	-4.81658	-4.33926	-3.90925	-3.52184	-3.17283	-2.85841	-2.57514	-2.31995	-2.09004	-1.88292	-1.69633	-1.52822	-1.37678	-1.24034	-1.11742	-1.00669	-0.906925	-0.81705	-0.736081
Voluntary high case $15	5135.32	-8.11622	-7.31191	-6.58731	-5.93451	-5.34641	-4.81658	-4.33926	-3.90925	-3.52184	-3.17283	-2.85841	-2.57514	-2.31995	-2.09004	-1.88292	-1.69633	-1.52822	-1.37678	-1.24034	-1.11742	-1.00669	-0.906925	-0.81705	-0.736081
Full compliance $30	10293.2	-9.00901	-9.00901	-9.00901	-9.00901	-9.00901	-9.00901	-9.00901	-9.00901	-9.00901	-9.00901	-9.00901	-9.00901	-9.00901	-9.00901	-9.00901	-9.00901	-9.00901	-9.00901	-9.00901	-9.00901	-9.00901	-9.00901	-9.00901	-9.00901
(5.3) Net present value (NPV) accumulation ($)
Voluntary low case $3	1009.05	1000.93	993.617	987.03	981.095	975.749	970.932	966.593	962.684	962.684	962.684	962.684	962.684	962.684	962.684	962.684	962.684	962.684	962.684	962.684	962.684	962.684	962.684	962.684	962.684
Voluntary mid case $7.8	2659.55	2651.44	2644.13	2637.54	2631.6	2626.26	2621.44	2617.1	2613.19	2613.19	2613.19	2613.19	2613.19	2613.19	2613.19	2613.19	2613.19	2613.19	2613.19	2613.19	2613.19	2613.19	2613.19	2613.19	2613.19
Voluntary high case $15	5135.32	5127.2	5119.89	5113.3	5107.37	5102.02	5097.2	5092.86	5088.95	5088.95	5088.95	5088.95	5088.95	5088.95	5088.95	5088.95	5088.95	5088.95	5088.95	5088.95	5088.95	5088.95	5088.95	5088.95	5088.95
Full compliance $30	10293.2	10284.1	10275.1	10266.1	10257.1	10248.1	10239.1	10230.1	10221.1	10221.1	10221.1	10221.1	10221.1	10221.1	10221.1	10221.1	10221.1	10221.1	10221.1	10221.1	10221.1	10221.1	10221.1	10221.1	10221.1
HALF UPFRONT PAYMENT WITH REMAINDER CONSTANT OVER 24 YEARS
Table S1C REDD+ economic model for 150 MgC/ha class
REDD ECONOMIC MODEL (constant price)
Variables	Values
Area (ha)	1
On-site annual deforestation rate	1
Percentage paid out in first year	0.5
Percentage paid out thereafter	0.020833
Discount rate	0.11
Rate of return on investment - rate of inflation
Ave forest biomass carbon (MgC/ha)	150
Ave oil palm biomass carbon (MgC/ha)	46
Net carbon savings through avoided deforestation (MgC/ha)	104
Net carbon emission savings through avoided deforestation (MgCO2e/ha) (MgC/CO2e = 1/3.67 ratio)	381.68
Annual appreciation for Carbon Financial Instruments (CFI)	0.05
REDD establishment cost ($/ha) (FIXED)	25
REDD annual running cost ($/ha) (FIXED)	10
REDD ECONOMIC MODEL OUTPUTS
Carbon pricing mechansim	NPV ($/ha25yr)	NPV ($/ha1yr)
Voluntary low case $3	597.46	23.8984
Voluntary mid case $7.8	1709.76	68.3906
Voluntary high case $15	3378.22	135.129
Full compliance $30	6854.18	274.167
REDD (EA) MODELING DETAILS:
(1) AVOIDED EMISSIONS
Year	2011	2012	2013	2014	2015	2016	2017	2018	2019	2020	2021	2022	2023	2024	2025	2026	2027	2028	2029	2030	2031	2032	2033	2034	2035
Time since establishment (year)	1	2	3	4	5	6	7	8	9	10	11	12	13	14	15	16	17	18	19	20	21	22	23	24	25
Avoided emissions (MgCO2e)	190.84	7.95154	7.95154	7.95154	7.95154	7.95154	7.95154	7.95154	7.95154	7.95154	7.95154	7.95154	7.95154	7.95154	7.95154	7.95154	7.95154	7.95154	7.95154	7.95154	7.95154	7.95154	7.95154	7.95154	7.95154
(2) CARBON PRICING MECHANISM
Year	2011	2012	2013	2014	2015	2016	2017	2018	2019	2020	2021	2022	2023	2024	2025	2026	2027	2028	2029	2030	2031	2032	2033	2034	2035
Time since establishment (year)	1	2	3	4	5	6	7	8	9	10	11	12	13	14	15	16	17	18	19	20	21	22	23	24	25
Voluntary low case $3	3	3	3	3	3	3	3	3	3	3	3	3	3	3	3	3	3	3	3	3	3	3	3	3	3
Voluntary mid case $7.8	7.8	7.8	7.8	7.8	7.8	7.8	7.8	7.8	7.8	7.8	7.8	7.8	7.8	7.8	7.8	7.8	7.8	7.8	7.8	7.8	7.8	7.8	7.8	7.8	7.8
Voluntary high case $15	15	15	15	15	15	15	15	15	15	15	15	15	15	15	15	15	15	15	15	15	15	15	15	15	15
Full compliance $30	30	30	30	30	30	30	30	30	30	30	30	30	30	30	30	30	30	30	30	30	30	30	30	30	30
(3) CARBON REVENUE
Year	2011	2012	2013	2014	2015	2016	2017	2018	2019	2020	2021	2022	2023	2024	2025	2026	2027	2028	2029	2030	2031	2032	2033	2034	2035
Time since establishment (year)	1	2	3	4	5	6	7	8	9	10	11	12	13	14	15	16	17	18	19	20	21	22	23	24	25
Voluntary low case $3	572.52	23.8546	23.8546	23.8546	23.8546	23.8546	23.8546	23.8546	23.8546	23.8546	23.8546	23.8546	23.8546	23.8546	23.8546	23.8546	23.8546	23.8546	23.8546	23.8546	23.8546	23.8546	23.8546	23.8546	23.8546
Voluntary mid case $7.8	1488.55	62.022	62.022	62.022	62.022	62.022	62.022	62.022	62.022	62.022	62.022	62.022	62.022	62.022	62.022	62.022	62.022	62.022	62.022	62.022	62.022	62.022	62.022	62.022	62.022
Voluntary high case $15	2862.6	119.273	119.273	119.273	119.273	119.273	119.273	119.273	119.273	119.273	119.273	119.273	119.273	119.273	119.273	119.273	119.273	119.273	119.273	119.273	119.273	119.273	119.273	119.273	119.273
Full compliance $30	5725.2	238.546	238.546	238.546	238.546	238.546	238.546	238.546	238.546	238.546	238.546	238.546	238.546	238.546	238.546	238.546	238.546	238.546	238.546	238.546	238.546	238.546	238.546	238.546	238.546
(4) REDD COSTS
Year	2011	2012	2013	2014	2015	2016	2017	2018	2019	2020	2021	2022	2023	2024	2025	2026	2027	2028	2029	2030	2031	2032	2033	2034	2035
Time since establishment (year)	1	2	3	4	5	6	7	8	9	10	11	12	13	14	15	16	17	18	19	20	21	22	23	24	25
REDD development and maintenance costs ($)	25	10	10	10	10	10	10	10	10	10	10	10	10	10	10	10	10	10	10	10	10	10	10	10	10
(5) REDD PROFIT SCENARIOS
Year	2011	2012	2013	2014	2015	2016	2017	2018	2019	2020	2021	2022	2023	2024	2025	2026	2027	2028	2029	2030	2031	2032	2033	2034	2035
Time since establishment (year)	1	2	3	4	5	6	7	8	9	10	11	12	13	14	15	16	17	18	19	20	21	22	23	24	25
(5.1) Carbon profit ($)
Voluntary low case $3	547.52	13.8546	13.8546	13.8546	13.8546	13.8546	13.8546	13.8546	13.8546	13.8546	13.8546	13.8546	13.8546	13.8546	13.8546	13.8546	13.8546	13.8546	13.8546	13.8546	13.8546	13.8546	13.8546	13.8546	13.8546
Voluntary mid case $7.8	1463.55	52.022	52.022	52.022	52.022	52.022	52.022	52.022	52.022	52.022	52.022	52.022	52.022	52.022	52.022	52.022	52.022	52.022	52.022	52.022	52.022	52.022	52.022	52.022	52.022
Voluntary high case $15	2837.6	109.273	109.273	109.273	109.273	109.273	109.273	109.273	109.273	109.273	109.273	109.273	109.273	109.273	109.273	109.273	109.273	109.273	109.273	109.273	109.273	109.273	109.273	109.273	109.273
Full compliance $30	5700.2	228.546	228.546	228.546	228.546	228.546	228.546	228.546	228.546	228.546	228.546	228.546	228.546	228.546	228.546	228.546	228.546	228.546	228.546	228.546	228.546	228.546	228.546	228.546	228.546
(5.2) REDD net present value (NPV) ($)
Voluntary low case $3	493.261	11.2447	10.1304	9.12647	8.22204	7.40724	6.67319	6.01189	5.41611	4.87938	4.39584	3.96022	3.56776	3.2142	2.89568	2.60872	2.3502	2.11729	1.90747	1.71844	1.54815	1.39473	1.25651	1.13199	1.01981
Voluntary mid case $7.8	1318.52	42.2222	38.038	34.2685	30.8725	27.8131	25.0568	22.5737	20.3367	18.3213	16.5057	14.87	13.3964	12.0688	10.8728	9.79534	8.82463	7.95012	7.16227	6.45249	5.81306	5.23699	4.71801	4.25046	3.82924
Voluntary high case $15	2556.4	88.6885	79.8995	71.9816	64.8483	58.4219	52.6323	47.4165	42.7176	38.4843	34.6705	31.2347	28.1394	25.3508	22.8386	20.5753	18.5363	16.6994	15.0445	13.5536	12.2104	11.0004	9.91025	8.92816	8.04338
Full compliance $30	5135.32	185.493	167.111	150.55	135.631	122.19	110.081	99.1722	89.3444	80.4904	72.5139	65.3278	58.8539	53.0215	47.7671	43.0335	38.7689	34.9269	31.4657	28.3475	25.5383	23.0074	20.7274	18.6734	16.8228
(5.3) Net present value (NPV) accumulation ($)
Voluntary low case $3	493.261	504.506	514.636	523.763	531.985	539.392	546.065	552.077	557.493	562.373	566.769	570.729	574.297	577.511	580.406	583.015	585.365	587.483	589.39	591.108	592.657	594.051	595.308	596.44	597.46
Voluntary mid case $7.8	1318.52	1360.74	1398.78	1433.04	1463.92	1491.73	1516.79	1539.36	1559.7	1578.02	1594.52	1609.39	1622.79	1634.86	1645.73	1655.53	1664.35	1672.3	1679.46	1685.92	1691.73	1696.97	1701.69	1705.94	1709.76
Voluntary high case $15	2556.4	2645.08	2724.98	2796.97	2861.81	2920.24	2972.87	3020.28	3063	3101.49	3136.16	3167.39	3195.53	3220.88	3243.72	3264.3	3282.83	3299.53	3314.58	3328.13	3340.34	3351.34	3361.25	3370.18	3378.22
Full compliance $30	5135.32	5320.81	5487.92	5638.47	5774.1	5896.29	6006.37	6105.54	6194.89	6275.38	6347.89	6413.22	6472.07	6525.1	6572.86	6615.9	6654.67	6689.59	6721.06	6749.41	6774.94	6797.95	6818.68	6837.35	6854.18

## Sheet: Table S1D_250 MgC
FULL UPFRONT PAYMENT
Table S1D REDD+ economic model for 250 MgC/ha class
REDD ECONOMIC MODEL (constant price)
Variables	Values
Area (ha)	1
On-site annual deforestation rate	1
Conversion period (years)	0
Discount rate	0.11
Rate of return on investment - rate of inflation
Ave forest biomass carbon (MgC/ha)	250
Ave oil palm biomass carbon (MgC/ha)	46
Net carbon savings through avoided deforestation (MgC/ha)	204
Net carbon emission savings through avoided deforestation (MgCO2e/ha) (MgC/CO2e = 1/3.67 ratio)	748.68
Annual appreciation for Carbon Financial Instruments (CFI)	0.05
REDD establishment cost ($/ha) (FIXED)	25
REDD annual running cost ($/ha) (FIXED)	10
REDD ECONOMIC MODEL OUTPUTS
Carbon pricing mechansim	NPV ($/ha25yr)	NPV ($/ha1yr)
Voluntary low case $3	1925.73	77.0291
Voluntary mid case $7.8	5163.26	206.531
Voluntary high case $15	10019.6	400.783
Full compliance $30	20136.9	805.475
REDD (EA) MODELING DETAILS:
(1) AVOIDED EMISSIONS
Year	2011	2012	2013	2014	2015	2016	2017	2018	2019	2020	2021	2022	2023	2024	2025	2026	2027	2028	2029	2030	2031	2032	2033	2034	2035
Time since establishment (year)	1	2	3	4	5	6	7	8	9	10	11	12	13	14	15	16	17	18	19	20	21	22	23	24	25
Avoided emissions (MgCO2e)	748.68	0	0	0	0	0	0	0	0	0	0	0	0	0	0	0	0	0	0	0	0	0	0	0	0
(2) CARBON PRICING MECHANISM
Year	2011	2012	2013	2014	2015	2016	2017	2018	2019	2020	2021	2022	2023	2024	2025	2026	2027	2028	2029	2030	2031	2032	2033	2034	2035
Time since establishment (year)	1	2	3	4	5	6	7	8	9	10	11	12	13	14	15	16	17	18	19	20	21	22	23	24	25
Voluntary low case $3	3	3	3	3	3	3	3	3	3	3	3	3	3	3	3	3	3	3	3	3	3	3	3	3	3
Voluntary mid case $7.8	7.8	7.8	7.8	7.8	7.8	7.8	7.8	7.8	7.8	7.8	7.8	7.8	7.8	7.8	7.8	7.8	7.8	7.8	7.8	7.8	7.8	7.8	7.8	7.8	7.8
Voluntary high case $15	15	15	15	15	15	15	15	15	15	15	15	15	15	15	15	15	15	15	15	15	15	15	15	15	15
Full compliance $30	30	30	30	30	30	30	30	30	30	30	30	30	30	30	30	30	30	30	30	30	30	30	30	30	30
(3) CARBON REVENUE
Year	2011	2012	2013	2014	2015	2016	2017	2018	2019	2020	2021	2022	2023	2024	2025	2026	2027	2028	2029	2030	2031	2032	2033	2034	2035
Time since establishment (year)	1	2	3	4	5	6	7	8	9	10	11	12	13	14	15	16	17	18	19	20	21	22	23	24	25
Voluntary low case $3	2246.04	0	0	0	0	0	0	0	0	0	0	0	0	0	0	0	0	0	0	0	0	0	0	0	0
Voluntary mid case $7.8	5839.7	0	0	0	0	0	0	0	0	0	0	0	0	0	0	0	0	0	0	0	0	0	0	0	0
Voluntary high case $15	11230.2	0	0	0	0	0	0	0	0	0	0	0	0	0	0	0	0	0	0	0	0	0	0	0	0
Full compliance $30	22460.4	0	0	0	0	0	0	0	0	0	0	0	0	0	0	0	0	0	0	0	0	0	0	0	0
(4) REDD COSTS
Year	2011	2012	2013	2014	2015	2016	2017	2018	2019	2020	2021	2022	2023	2024	2025	2026	2027	2028	2029	2030	2031	2032	2033	2034	2035
Time since establishment (year)	1	2	3	4	5	6	7	8	9	10	11	12	13	14	15	16	17	18	19	20	21	22	23	24	25
REDD development and maintenance costs ($)	25	10	10	10	10	10	10	10	10	10	10	10	10	10	10	10	10	10	10	10	10	10	10	10	10
(5) REDD PROFIT SCENARIOS
Year	2011	2012	2013	2014	2015	2016	2017	2018	2019	2020	2021	2022	2023	2024	2025	2026	2027	2028	2029	2030	2031	2032	2033	2034	2035
Time since establishment (year)	1	2	3	4	5	6	7	8	9	10	11	12	13	14	15	16	17	18	19	20	21	22	23	24	25
(5.1) Carbon profit ($)
Voluntary low case $3	2221.04	-10	-10	-10	-10	-10	-10	-10	-10	-10	-10	-10	-10	-10	-10	-10	-10	-10	-10	-10	-10	-10	-10	-10	-10
Voluntary mid case $7.8	5814.7	-10	-10	-10	-10	-10	-10	-10	-10	-10	-10	-10	-10	-10	-10	-10	-10	-10	-10	-10	-10	-10	-10	-10	-10
Voluntary high case $15	11205.2	-10	-10	-10	-10	-10	-10	-10	-10	-10	-10	-10	-10	-10	-10	-10	-10	-10	-10	-10	-10	-10	-10	-10	-10
Full compliance $30	22435.4	-10	-10	-10	-10	-10	-10	-10	-10	-10	-10	-10	-10	-10	-10	-10	-10	-10	-10	-10	-10	-10	-10	-10	-10
(5.2) REDD net present value (NPV) ($)
Voluntary low case $3	2000.94	-8.11622	-7.31191	-6.58731	-5.93451	-5.34641	-4.81658	-4.33926	-3.90925	-3.52184	-3.17283	-2.85841	-2.57514	-2.31995	-2.09004	-1.88292	-1.69633	-1.52822	-1.37678	-1.24034	-1.11742	-1.00669	-0.906925	-0.81705	-0.736081
Voluntary mid case $7.8	5238.47	-8.11622	-7.31191	-6.58731	-5.93451	-5.34641	-4.81658	-4.33926	-3.90925	-3.52184	-3.17283	-2.85841	-2.57514	-2.31995	-2.09004	-1.88292	-1.69633	-1.52822	-1.37678	-1.24034	-1.11742	-1.00669	-0.906925	-0.81705	-0.736081
Voluntary high case $15	10094.8	-8.11622	-7.31191	-6.58731	-5.93451	-5.34641	-4.81658	-4.33926	-3.90925	-3.52184	-3.17283	-2.85841	-2.57514	-2.31995	-2.09004	-1.88292	-1.69633	-1.52822	-1.37678	-1.24034	-1.11742	-1.00669	-0.906925	-0.81705	-0.736081
Full compliance $30	20212.1	-9.00901	-9.00901	-9.00901	-9.00901	-9.00901	-9.00901	-9.00901	-9.00901	-9.00901	-9.00901	-9.00901	-9.00901	-9.00901	-9.00901	-9.00901	-9.00901	-9.00901	-9.00901	-9.00901	-9.00901	-9.00901	-9.00901	-9.00901	-9.00901
(5.3) Net present value (NPV) accumulation ($)
Voluntary low case $3	2000.94	1992.82	1985.51	1978.92	1972.99	1967.64	1962.82	1958.48	1954.58	1954.58	1954.58	1954.58	1954.58	1954.58	1954.58	1954.58	1954.58	1954.58	1954.58	1954.58	1954.58	1954.58	1954.58	1954.58	1954.58
Voluntary mid case $7.8	5238.47	5230.36	5223.04	5216.46	5210.52	5205.18	5200.36	5196.02	5192.11	5192.11	5192.11	5192.11	5192.11	5192.11	5192.11	5192.11	5192.11	5192.11	5192.11	5192.11	5192.11	5192.11	5192.11	5192.11	5192.11
Voluntary high case $15	10094.8	10086.7	10079.3	10072.8	10066.8	10061.5	10056.7	10052.3	10048.4	10048.4	10048.4	10048.4	10048.4	10048.4	10048.4	10048.4	10048.4	10048.4	10048.4	10048.4	10048.4	10048.4	10048.4	10048.4	10048.4
Full compliance $30	20212.1	20203.1	20194.1	20185	20176	20167	20158	20149	20140	20140	20140	20140	20140	20140	20140	20140	20140	20140	20140	20140	20140	20140	20140	20140	20140
HALF UPFRONT PAYMENT WITH REMAINDER CONSTANT OVER 24 YEARS
Table S1D REDD+ economic model for 250 MgC/ha class
REDD ECONOMIC MODEL (constant price)
Variables	Values
Area (ha)	1
On-site annual deforestation rate	1
Percentage paid out in first year	0.5
Percentage paid out thereafter	0.020833
Discount rate	0.11
Rate of return on investment - rate of inflation
Ave forest biomass carbon (MgC/ha)	250
Ave oil palm biomass carbon (MgC/ha)	46
Net carbon savings through avoided deforestation (MgC/ha)	204
Net carbon emission savings through avoided deforestation (MgCO2e/ha) (MgC/CO2e = 1/3.67 ratio)	748.68
Annual appreciation for Carbon Financial Instruments (CFI)	0.05
REDD establishment cost ($/ha) (FIXED)	25
REDD annual running cost ($/ha) (FIXED)	10
REDD ECONOMIC MODEL OUTPUTS
Carbon pricing mechansim	NPV ($/ha25yr)	NPV ($/ha1yr)
Voluntary low case $3	1265.91	50.6365
Voluntary mid case $7.8	3447.74	137.91
Voluntary high case $15	6720.48	268.819
Full compliance $30	13538.7	541.548
REDD (EA) MODELING DETAILS:
(1) AVOIDED EMISSIONS
Year	2011	2012	2013	2014	2015	2016	2017	2018	2019	2020	2021	2022	2023	2024	2025	2026	2027	2028	2029	2030	2031	2032	2033	2034	2035
Time since establishment (year)	1	2	3	4	5	6	7	8	9	10	11	12	13	14	15	16	17	18	19	20	21	22	23	24	25
Avoided emissions (MgCO2e)	374.34	15.5973	15.5973	15.5973	15.5973	15.5973	15.5973	15.5973	15.5973	15.5973	15.5973	15.5973	15.5973	15.5973	15.5973	15.5973	15.5973	15.5973	15.5973	15.5973	15.5973	15.5973	15.5973	15.5973	15.5973
(2) CARBON PRICING MECHANISM
Year	2011	2012	2013	2014	2015	2016	2017	2018	2019	2020	2021	2022	2023	2024	2025	2026	2027	2028	2029	2030	2031	2032	2033	2034	2035
Time since establishment (year)	1	2	3	4	5	6	7	8	9	10	11	12	13	14	15	16	17	18	19	20	21	22	23	24	25
Voluntary low case $3	3	3	3	3	3	3	3	3	3	3	3	3	3	3	3	3	3	3	3	3	3	3	3	3	3
Voluntary mid case $7.8	7.8	7.8	7.8	7.8	7.8	7.8	7.8	7.8	7.8	7.8	7.8	7.8	7.8	7.8	7.8	7.8	7.8	7.8	7.8	7.8	7.8	7.8	7.8	7.8	7.8
Voluntary high case $15	15	15	15	15	15	15	15	15	15	15	15	15	15	15	15	15	15	15	15	15	15	15	15	15	15
Full compliance $30	30	30	30	30	30	30	30	30	30	30	30	30	30	30	30	30	30	30	30	30	30	30	30	30	30
(3) CARBON REVENUE
Year	2011	2012	2013	2014	2015	2016	2017	2018	2019	2020	2021	2022	2023	2024	2025	2026	2027	2028	2029	2030	2031	2032	2033	2034	2035
Time since establishment (year)	1	2	3	4	5	6	7	8	9	10	11	12	13	14	15	16	17	18	19	20	21	22	23	24	25
Voluntary low case $3	1123.02	46.7918	46.7918	46.7918	46.7918	46.7918	46.7918	46.7918	46.7918	46.7918	46.7918	46.7918	46.7918	46.7918	46.7918	46.7918	46.7918	46.7918	46.7918	46.7918	46.7918	46.7918	46.7918	46.7918	46.7918
Voluntary mid case $7.8	2919.85	121.659	121.659	121.659	121.659	121.659	121.659	121.659	121.659	121.659	121.659	121.659	121.659	121.659	121.659	121.659	121.659	121.659	121.659	121.659	121.659	121.659	121.659	121.659	121.659
Voluntary high case $15	5615.1	233.959	233.959	233.959	233.959	233.959	233.959	233.959	233.959	233.959	233.959	233.959	233.959	233.959	233.959	233.959	233.959	233.959	233.959	233.959	233.959	233.959	233.959	233.959	233.959
Full compliance $30	11230.2	467.918	467.918	467.918	467.918	467.918	467.918	467.918	467.918	467.918	467.918	467.918	467.918	467.918	467.918	467.918	467.918	467.918	467.918	467.918	467.918	467.918	467.918	467.918	467.918
(4) REDD COSTS
Year	2011	2012	2013	2014	2015	2016	2017	2018	2019	2020	2021	2022	2023	2024	2025	2026	2027	2028	2029	2030	2031	2032	2033	2034	2035
Time since establishment (year)	1	2	3	4	5	6	7	8	9	10	11	12	13	14	15	16	17	18	19	20	21	22	23	24	25
REDD development and maintenance costs ($)	25	10	10	10	10	10	10	10	10	10	10	10	10	10	10	10	10	10	10	10	10	10	10	10	10
(5) REDD PROFIT SCENARIOS
Year	2011	2012	2013	2014	2015	2016	2017	2018	2019	2020	2021	2022	2023	2024	2025	2026	2027	2028	2029	2030	2031	2032	2033	2034	2035
Time since establishment (year)	1	2	3	4	5	6	7	8	9	10	11	12	13	14	15	16	17	18	19	20	21	22	23	24	25
(5.1) Carbon profit ($)
Voluntary low case $3	1098.02	36.7918	36.7918	36.7918	36.7918	36.7918	36.7918	36.7918	36.7918	36.7918	36.7918	36.7918	36.7918	36.7918	36.7918	36.7918	36.7918	36.7918	36.7918	36.7918	36.7918	36.7918	36.7918	36.7918	36.7918
Voluntary mid case $7.8	2894.85	111.659	111.659	111.659	111.659	111.659	111.659	111.659	111.659	111.659	111.659	111.659	111.659	111.659	111.659	111.659	111.659	111.659	111.659	111.659	111.659	111.659	111.659	111.659	111.659
Voluntary high case $15	5590.1	223.959	223.959	223.959	223.959	223.959	223.959	223.959	223.959	223.959	223.959	223.959	223.959	223.959	223.959	223.959	223.959	223.959	223.959	223.959	223.959	223.959	223.959	223.959	223.959
Full compliance $30	11205.2	457.918	457.918	457.918	457.918	457.918	457.918	457.918	457.918	457.918	457.918	457.918	457.918	457.918	457.918	457.918	457.918	457.918	457.918	457.918	457.918	457.918	457.918	457.918	457.918
(5.2) REDD net present value (NPV) ($)
Voluntary low case $3	989.207	29.861	26.9018	24.2359	21.8341	19.6704	17.7211	15.9649	14.3828	12.9575	11.6734	10.5166	9.4744	8.5355	7.68964	6.9276	6.24108	5.6226	5.0654	4.56342	4.11119	3.70378	3.33674	3.00607	2.70817
Voluntary mid case $7.8	2607.97	90.6246	81.6438	73.5529	66.2639	59.6972	53.7813	48.4516	43.6501	39.3244	35.4274	31.9166	28.7537	25.9042	23.3371	21.0244	18.9409	17.0639	15.3729	13.8494	12.477	11.2405	10.1266	9.12306	8.21897
Voluntary high case $15	5036.13	181.77	163.757	147.529	132.909	119.737	107.872	97.1816	87.551	78.8748	71.0584	64.0166	57.6726	51.9573	46.8084	42.1697	37.9907	34.2259	30.8341	27.7785	25.0257	22.5456	20.3114	18.2985	16.4852
Full compliance $30	10094.8	371.656	334.825	301.644	271.752	244.821	220.56	198.703	179.011	161.271	145.29	130.892	117.92	106.234	95.7068	86.2223	77.6777	69.98	63.045	56.7973	51.1687	46.098	41.5297	37.4141	33.7064
(5.3) Net present value (NPV) accumulation ($)
Voluntary low case $3	989.207	1019.07	1045.97	1070.21	1092.04	1111.71	1129.43	1145.4	1159.78	1172.74	1184.41	1194.93	1204.4	1212.94	1220.63	1227.55	1233.79	1239.42	1244.48	1249.05	1253.16	1256.86	1260.2	1263.2	1265.91
Voluntary mid case $7.8	2607.97	2698.6	2780.24	2853.8	2920.06	2979.76	3033.54	3081.99	3125.64	3164.96	3200.39	3232.31	3261.06	3286.97	3310.3	3331.33	3350.27	3367.33	3382.71	3396.56	3409.03	3420.27	3430.4	3439.52	3447.74
Voluntary high case $15	5036.13	5217.9	5381.65	5529.18	5662.09	5781.83	5889.7	5986.88	6074.43	6153.31	6224.36	6288.38	6346.05	6398.01	6444.82	6486.99	6524.98	6559.21	6590.04	6617.82	6642.84	6665.39	6685.7	6704	6720.48
Full compliance $30	10094.8	10466.4	10801.3	11102.9	11374.7	11619.5	11840	12038.7	12217.7	12379	12524.3	12655.2	12773.1	12879.4	12975.1	13061.3	13139	13208.9	13272	13328.8	13380	13426.1	13467.6	13505	13538.7

## Sheet: Table S1E_350 MgC
FULL UPFRONT PAYMENT
Table S1E REDD+ economic model for 350 MgC/ha class
REDD ECONOMIC MODEL (constant price)
Variables	Values
Area (ha)	1
On-site annual deforestation rate	1
Conversion period (years)	0
Discount rate	0.11
Rate of return on investment - rate of inflation
Ave forest biomass carbon (MgC/ha)	350
Ave oil palm biomass carbon (MgC/ha)	46
Net carbon savings through avoided deforestation (MgC/ha)	304
Net carbon emission savings through avoided deforestation (MgCO2e/ha) (MgC/CO2e = 1/3.67 ratio)	1115.68
Annual appreciation for Carbon Financial Instruments (CFI)	0.05
REDD establishment cost ($/ha) (FIXED)	25
REDD annual running cost ($/ha) (FIXED)	10
REDD ECONOMIC MODEL OUTPUTS
Carbon pricing mechansim	NPV ($/ha25yr)	NPV ($/ha1yr)
Voluntary low case $3	2917.62	116.705
Voluntary mid case $7.8	7742.18	309.687
Voluntary high case $15	14979	599.161
Full compliance $30	30055.8	1202.23
REDD (EA) MODELING DETAILS:
(1) AVOIDED EMISSIONS
Year	2011	2012	2013	2014	2015	2016	2017	2018	2019	2020	2021	2022	2023	2024	2025	2026	2027	2028	2029	2030	2031	2032	2033	2034	2035
Time since establishment (year)	1	2	3	4	5	6	7	8	9	10	11	12	13	14	15	16	17	18	19	20	21	22	23	24	25
Avoided emissions (MgCO2e)	1115.68	0	0	0	0	0	0	0	0	0	0	0	0	0	0	0	0	0	0	0	0	0	0	0	0
(2) CARBON PRICING MECHANISM
Year	2011	2012	2013	2014	2015	2016	2017	2018	2019	2020	2021	2022	2023	2024	2025	2026	2027	2028	2029	2030	2031	2032	2033	2034	2035
Time since establishment (year)	1	2	3	4	5	6	7	8	9	10	11	12	13	14	15	16	17	18	19	20	21	22	23	24	25
Voluntary low case $3	3	3	3	3	3	3	3	3	3	3	3	3	3	3	3	3	3	3	3	3	3	3	3	3	3
Voluntary mid case $7.8	7.8	7.8	7.8	7.8	7.8	7.8	7.8	7.8	7.8	7.8	7.8	7.8	7.8	7.8	7.8	7.8	7.8	7.8	7.8	7.8	7.8	7.8	7.8	7.8	7.8
Voluntary high case $15	15	15	15	15	15	15	15	15	15	15	15	15	15	15	15	15	15	15	15	15	15	15	15	15	15
Full compliance $30	30	30	30	30	30	30	30	30	30	30	30	30	30	30	30	30	30	30	30	30	30	30	30	30	30
(3) CARBON REVENUE
Year	2011	2012	2013	2014	2015	2016	2017	2018	2019	2020	2021	2022	2023	2024	2025	2026	2027	2028	2029	2030	2031	2032	2033	2034	2035
Time since establishment (year)	1	2	3	4	5	6	7	8	9	10	11	12	13	14	15	16	17	18	19	20	21	22	23	24	25
Voluntary low case $3	3347.04	0	0	0	0	0	0	0	0	0	0	0	0	0	0	0	0	0	0	0	0	0	0	0	0
Voluntary mid case $7.8	8702.3	0	0	0	0	0	0	0	0	0	0	0	0	0	0	0	0	0	0	0	0	0	0	0	0
Voluntary high case $15	16735.2	0	0	0	0	0	0	0	0	0	0	0	0	0	0	0	0	0	0	0	0	0	0	0	0
Full compliance $30	33470.4	0	0	0	0	0	0	0	0	0	0	0	0	0	0	0	0	0	0	0	0	0	0	0	0
(4) REDD COSTS
Year	2011	2012	2013	2014	2015	2016	2017	2018	2019	2020	2021	2022	2023	2024	2025	2026	2027	2028	2029	2030	2031	2032	2033	2034	2035
Time since establishment (year)	1	2	3	4	5	6	7	8	9	10	11	12	13	14	15	16	17	18	19	20	21	22	23	24	25
REDD development and maintenance costs ($)	25	10	10	10	10	10	10	10	10	10	10	10	10	10	10	10	10	10	10	10	10	10	10	10	10
(5) REDD PROFIT SCENARIOS
Year	2011	2012	2013	2014	2015	2016	2017	2018	2019	2020	2021	2022	2023	2024	2025	2026	2027	2028	2029	2030	2031	2032	2033	2034	2035
Time since establishment (year)	1	2	3	4	5	6	7	8	9	10	11	12	13	14	15	16	17	18	19	20	21	22	23	24	25
(5.1) Carbon profit ($)
Voluntary low case $3	3322.04	-10	-10	-10	-10	-10	-10	-10	-10	-10	-10	-10	-10	-10	-10	-10	-10	-10	-10	-10	-10	-10	-10	-10	-10
Voluntary mid case $7.8	8677.3	-10	-10	-10	-10	-10	-10	-10	-10	-10	-10	-10	-10	-10	-10	-10	-10	-10	-10	-10	-10	-10	-10	-10	-10
Voluntary high case $15	16710.2	-10	-10	-10	-10	-10	-10	-10	-10	-10	-10	-10	-10	-10	-10	-10	-10	-10	-10	-10	-10	-10	-10	-10	-10
Full compliance $30	33445.4	-10	-10	-10	-10	-10	-10	-10	-10	-10	-10	-10	-10	-10	-10	-10	-10	-10	-10	-10	-10	-10	-10	-10	-10
(5.2) REDD net present value (NPV) ($)
Voluntary low case $3	2992.83	-8.11622	-7.31191	-6.58731	-5.93451	-5.34641	-4.81658	-4.33926	-3.90925	-3.52184	-3.17283	-2.85841	-2.57514	-2.31995	-2.09004	-1.88292	-1.69633	-1.52822	-1.37678	-1.24034	-1.11742	-1.00669	-0.906925	-0.81705	-0.736081
Voluntary mid case $7.8	7817.39	-8.11622	-7.31191	-6.58731	-5.93451	-5.34641	-4.81658	-4.33926	-3.90925	-3.52184	-3.17283	-2.85841	-2.57514	-2.31995	-2.09004	-1.88292	-1.69633	-1.52822	-1.37678	-1.24034	-1.11742	-1.00669	-0.906925	-0.81705	-0.736081
Voluntary high case $15	15054.2	-8.11622	-7.31191	-6.58731	-5.93451	-5.34641	-4.81658	-4.33926	-3.90925	-3.52184	-3.17283	-2.85841	-2.57514	-2.31995	-2.09004	-1.88292	-1.69633	-1.52822	-1.37678	-1.24034	-1.11742	-1.00669	-0.906925	-0.81705	-0.736081
Full compliance $30	30131	-9.00901	-9.00901	-9.00901	-9.00901	-9.00901	-9.00901	-9.00901	-9.00901	-9.00901	-9.00901	-9.00901	-9.00901	-9.00901	-9.00901	-9.00901	-9.00901	-9.00901	-9.00901	-9.00901	-9.00901	-9.00901	-9.00901	-9.00901	-9.00901
(5.3) Net present value (NPV) accumulation ($)
Voluntary low case $3	2992.83	2984.71	2977.4	2970.81	2964.88	2959.53	2954.72	2950.38	2946.47	2946.47	2946.47	2946.47	2946.47	2946.47	2946.47	2946.47	2946.47	2946.47	2946.47	2946.47	2946.47	2946.47	2946.47	2946.47	2946.47
Voluntary mid case $7.8	7817.39	7809.27	7801.96	7795.38	7789.44	7784.09	7779.28	7774.94	7771.03	7771.03	7771.03	7771.03	7771.03	7771.03	7771.03	7771.03	7771.03	7771.03	7771.03	7771.03	7771.03	7771.03	7771.03	7771.03	7771.03
Voluntary high case $15	15054.2	15046.1	15038.8	15032.2	15026.3	15020.9	15016.1	15011.8	15007.9	15007.9	15007.9	15007.9	15007.9	15007.9	15007.9	15007.9	15007.9	15007.9	15007.9	15007.9	15007.9	15007.9	15007.9	15007.9	15007.9
Full compliance $30	30131	30122	30113	30104	30095	30085.9	30076.9	30067.9	30058.9	30058.9	30058.9	30058.9	30058.9	30058.9	30058.9	30058.9	30058.9	30058.9	30058.9	30058.9	30058.9	30058.9	30058.9	30058.9	30058.9
HALF UPFRONT PAYMENT WITH REMAINDER CONSTANT OVER 24 YEARS
Table S1E REDD+ economic model for 350 MgC/ha class
REDD ECONOMIC MODEL (constant price)
Variables	Values
Area (ha)	1
On-site annual deforestation rate	1
Percentage paid out in first year	0.5
Percentage paid out thereafter	0.020833
Discount rate	0.11
Rate of return on investment - rate of inflation
Ave forest biomass carbon (MgC/ha)	350
Ave oil palm biomass carbon (MgC/ha)	46
Net carbon savings through avoided deforestation (MgC/ha)	304
Net carbon emission savings through avoided deforestation (MgCO2e/ha) (MgC/CO2e = 1/3.67 ratio)	1115.68
Annual appreciation for Carbon Financial Instruments (CFI)	0.05
REDD establishment cost ($/ha) (FIXED)	25
REDD annual running cost ($/ha) (FIXED)	10
REDD ECONOMIC MODEL OUTPUTS
Carbon pricing mechansim	NPV ($/ha25yr)	NPV ($/ha1yr)
Voluntary low case $3	1934.36	77.3746
Voluntary mid case $7.8	5185.72	207.429
Voluntary high case $15	10062.7	402.51
Full compliance $30	20223.2	808.929
REDD (EA) MODELING DETAILS:
(1) AVOIDED EMISSIONS
Year	2011	2012	2013	2014	2015	2016	2017	2018	2019	2020	2021	2022	2023	2024	2025	2026	2027	2028	2029	2030	2031	2032	2033	2034	2035
Time since establishment (year)	1	2	3	4	5	6	7	8	9	10	11	12	13	14	15	16	17	18	19	20	21	22	23	24	25
Avoided emissions (MgCO2e)	557.84	23.243	23.243	23.243	23.243	23.243	23.243	23.243	23.243	23.243	23.243	23.243	23.243	23.243	23.243	23.243	23.243	23.243	23.243	23.243	23.243	23.243	23.243	23.243	23.243
(2) CARBON PRICING MECHANISM
Year	2011	2012	2013	2014	2015	2016	2017	2018	2019	2020	2021	2022	2023	2024	2025	2026	2027	2028	2029	2030	2031	2032	2033	2034	2035
Time since establishment (year)	1	2	3	4	5	6	7	8	9	10	11	12	13	14	15	16	17	18	19	20	21	22	23	24	25
Voluntary low case $3	3	3	3	3	3	3	3	3	3	3	3	3	3	3	3	3	3	3	3	3	3	3	3	3	3
Voluntary mid case $7.8	7.8	7.8	7.8	7.8	7.8	7.8	7.8	7.8	7.8	7.8	7.8	7.8	7.8	7.8	7.8	7.8	7.8	7.8	7.8	7.8	7.8	7.8	7.8	7.8	7.8
Voluntary high case $15	15	15	15	15	15	15	15	15	15	15	15	15	15	15	15	15	15	15	15	15	15	15	15	15	15
Full compliance $30	30	30	30	30	30	30	30	30	30	30	30	30	30	30	30	30	30	30	30	30	30	30	30	30	30
(3) CARBON REVENUE
Year	2011	2012	2013	2014	2015	2016	2017	2018	2019	2020	2021	2022	2023	2024	2025	2026	2027	2028	2029	2030	2031	2032	2033	2034	2035
Time since establishment (year)	1	2	3	4	5	6	7	8	9	10	11	12	13	14	15	16	17	18	19	20	21	22	23	24	25
Voluntary low case $3	1673.52	69.7289	69.7289	69.7289	69.7289	69.7289	69.7289	69.7289	69.7289	69.7289	69.7289	69.7289	69.7289	69.7289	69.7289	69.7289	69.7289	69.7289	69.7289	69.7289	69.7289	69.7289	69.7289	69.7289	69.7289
Voluntary mid case $7.8	4351.15	181.295	181.295	181.295	181.295	181.295	181.295	181.295	181.295	181.295	181.295	181.295	181.295	181.295	181.295	181.295	181.295	181.295	181.295	181.295	181.295	181.295	181.295	181.295	181.295
Voluntary high case $15	8367.6	348.644	348.644	348.644	348.644	348.644	348.644	348.644	348.644	348.644	348.644	348.644	348.644	348.644	348.644	348.644	348.644	348.644	348.644	348.644	348.644	348.644	348.644	348.644	348.644
Full compliance $30	16735.2	697.289	697.289	697.289	697.289	697.289	697.289	697.289	697.289	697.289	697.289	697.289	697.289	697.289	697.289	697.289	697.289	697.289	697.289	697.289	697.289	697.289	697.289	697.289	697.289
(4) REDD COSTS
Year	2011	2012	2013	2014	2015	2016	2017	2018	2019	2020	2021	2022	2023	2024	2025	2026	2027	2028	2029	2030	2031	2032	2033	2034	2035
Time since establishment (year)	1	2	3	4	5	6	7	8	9	10	11	12	13	14	15	16	17	18	19	20	21	22	23	24	25
REDD development and maintenance costs ($)	25	10	10	10	10	10	10	10	10	10	10	10	10	10	10	10	10	10	10	10	10	10	10	10	10
(5) REDD PROFIT SCENARIOS
Year	2011	2012	2013	2014	2015	2016	2017	2018	2019	2020	2021	2022	2023	2024	2025	2026	2027	2028	2029	2030	2031	2032	2033	2034	2035
Time since establishment (year)	1	2	3	4	5	6	7	8	9	10	11	12	13	14	15	16	17	18	19	20	21	22	23	24	25
(5.1) Carbon profit ($)
Voluntary low case $3	1648.52	59.7289	59.7289	59.7289	59.7289	59.7289	59.7289	59.7289	59.7289	59.7289	59.7289	59.7289	59.7289	59.7289	59.7289	59.7289	59.7289	59.7289	59.7289	59.7289	59.7289	59.7289	59.7289	59.7289	59.7289
Voluntary mid case $7.8	4326.15	171.295	171.295	171.295	171.295	171.295	171.295	171.295	171.295	171.295	171.295	171.295	171.295	171.295	171.295	171.295	171.295	171.295	171.295	171.295	171.295	171.295	171.295	171.295	171.295
Voluntary high case $15	8342.6	338.644	338.644	338.644	338.644	338.644	338.644	338.644	338.644	338.644	338.644	338.644	338.644	338.644	338.644	338.644	338.644	338.644	338.644	338.644	338.644	338.644	338.644	338.644	338.644
Full compliance $30	16710.2	687.289	687.289	687.289	687.289	687.289	687.289	687.289	687.289	687.289	687.289	687.289	687.289	687.289	687.289	687.289	687.289	687.289	687.289	687.289	687.289	687.289	687.289	687.289	687.289
(5.2) REDD net present value (NPV) ($)
Voluntary low case $3	1485.15	48.4773	43.6732	39.3453	35.4462	31.9335	28.7689	25.9179	23.3495	21.0356	18.951	17.073	15.381	13.8568	12.4836	11.2465	10.132	9.1279	8.22333	7.40841	6.67424	6.01283	5.41696	4.88015	4.39653
Voluntary mid case $7.8	3897.43	139.027	125.25	112.837	101.655	91.5814	82.5057	74.3295	66.9635	60.3275	54.3491	48.9631	44.1109	39.7396	35.8014	32.2535	29.0572	26.1777	23.5835	21.2464	19.1409	17.2441	15.5352	13.9957	12.6087
Voluntary high case $15	7515.86	274.851	247.614	223.076	200.969	181.053	163.111	146.947	132.384	119.265	107.446	96.7984	87.2058	78.5638	70.7782	63.7641	57.4451	51.7524	46.6238	42.0034	37.8409	34.0909	30.7125	27.6689	24.927
Full compliance $30	15054.2	557.819	502.54	452.738	407.872	367.453	331.038	298.233	268.678	242.052	218.065	196.455	176.987	159.447	143.646	129.411	116.587	105.033	94.6243	85.2471	76.7992	69.1885	62.332	56.1549	50.59
(5.3) Net present value (NPV) accumulation ($)
Voluntary low case $3	1485.15	1533.63	1577.3	1616.65	1652.1	1684.03	1712.8	1738.72	1762.07	1783.1	1802.05	1819.12	1834.51	1848.36	1860.85	1872.09	1882.22	1891.35	1899.58	1906.98	1913.66	1919.67	1925.09	1929.97	1934.36
Voluntary mid case $7.8	3897.43	4036.46	4161.71	4274.55	4376.2	4467.78	4550.29	4624.62	4691.58	4751.91	4806.26	4855.22	4899.33	4939.07	4974.88	5007.13	5036.19	5062.36	5085.95	5107.19	5126.33	5143.58	5159.11	5173.11	5185.72
Voluntary high case $15	7515.86	7790.71	8038.32	8261.4	8462.37	8643.42	8806.53	8953.48	9085.86	9205.13	9312.57	9409.37	9496.58	9575.14	9645.92	9709.68	9767.13	9818.88	9865.5	9907.51	9945.35	9979.44	10010.2	10037.8	10062.7
Full compliance $30	15054.2	15612.1	16114.6	16567.3	16975.2	17342.7	17673.7	17971.9	18240.6	18482.7	18700.7	18897.2	19074.2	19233.6	19377.3	19506.7	19623.3	19728.3	19822.9	19908.2	19985	20054.1	20116.5	20172.6	20223.2

## Sheet: Table S1F_450 MgC
FULL UPFRONT PAYMENT
Table S1F REDD+ economic model for 450 MgC/ha class
REDD ECONOMIC MODEL (constant price)
Variables	Values
Area (ha)	1
On-site annual deforestation rate	1
Conversion period (years)	1
Discount rate	0.11
Rate of return on investment - rate of inflation
Ave forest biomass carbon (MgC/ha)	450
Ave oil palm biomass carbon (MgC/ha)	46
Net carbon savings through avoided deforestation (MgC/ha)	404
Net carbon emission savings through avoided deforestation (MgCO2e/ha) (MgC/CO2e = 1/3.67 ratio)	1482.68
Annual appreciation for Carbon Financial Instruments (CFI)	0.05
REDD establishment cost ($/ha) (FIXED)	25
REDD annual running cost ($/ha) (FIXED)	10
REDD ECONOMIC MODEL OUTPUTS
Carbon pricing mechansim	NPV ($/ha25yr)	NPV ($/ha1yr)
Voluntary low case $3	3909.51	156.38
Voluntary mid case $7.8	10321.1	412.844
Voluntary high case $15	19938.5	797.539
Full compliance $30	39974.7	1598.99
REDD (EA) MODELING DETAILS:
(1) AVOIDED EMISSIONS
Year	2011	2012	2013	2014	2015	2016	2017	2018	2019	2020	2021	2022	2023	2024	2025	2026	2027	2028	2029	2030	2031	2032	2033	2034	2035
Time since establishment (year)	1	2	3	4	5	6	7	8	9	10	11	12	13	14	15	16	17	18	19	20	21	22	23	24	25
Avoided emissions (MgCO2e)	1482.68	0	0	0	0	0	0	0	0	0	0	0	0	0	0	0	0	0	0	0	0	0	0	0	0
(2) CARBON PRICING MECHANISM
Year	2011	2012	2013	2014	2015	2016	2017	2018	2019	2020	2021	2022	2023	2024	2025	2026	2027	2028	2029	2030	2031	2032	2033	2034	2035
Time since establishment (year)	1	2	3	4	5	6	7	8	9	10	11	12	13	14	15	16	17	18	19	20	21	22	23	24	25
Voluntary low case $3	3	3	3	3	3	3	3	3	3	3	3	3	3	3	3	3	3	3	3	3	3	3	3	3	3
Voluntary mid case $7.8	7.8	7.8	7.8	7.8	7.8	7.8	7.8	7.8	7.8	7.8	7.8	7.8	7.8	7.8	7.8	7.8	7.8	7.8	7.8	7.8	7.8	7.8	7.8	7.8	7.8
Voluntary high case $15	15	15	15	15	15	15	15	15	15	15	15	15	15	15	15	15	15	15	15	15	15	15	15	15	15
Full compliance $30	30	30	30	30	30	30	30	30	30	30	30	30	30	30	30	30	30	30	30	30	30	30	30	30	30
(3) CARBON REVENUE
Year	2011	2012	2013	2014	2015	2016	2017	2018	2019	2020	2021	2022	2023	2024	2025	2026	2027	2028	2029	2030	2031	2032	2033	2034	2035
Time since establishment (year)	1	2	3	4	5	6	7	8	9	10	11	12	13	14	15	16	17	18	19	20	21	22	23	24	25
Voluntary low case $3	4448.04	0	0	0	0	0	0	0	0	0	0	0	0	0	0	0	0	0	0	0	0	0	0	0	0
Voluntary mid case $7.8	11564.9	0	0	0	0	0	0	0	0	0	0	0	0	0	0	0	0	0	0	0	0	0	0	0	0
Voluntary high case $15	22240.2	0	0	0	0	0	0	0	0	0	0	0	0	0	0	0	0	0	0	0	0	0	0	0	0
Full compliance $30	44480.4	0	0	0	0	0	0	0	0	0	0	0	0	0	0	0	0	0	0	0	0	0	0	0	0
(4) REDD COSTS
Year	2011	2012	2013	2014	2015	2016	2017	2018	2019	2020	2021	2022	2023	2024	2025	2026	2027	2028	2029	2030	2031	2032	2033	2034	2035
Time since establishment (year)	1	2	3	4	5	6	7	8	9	10	11	12	13	14	15	16	17	18	19	20	21	22	23	24	25
REDD development and maintenance costs ($)	25	10	10	10	10	10	10	10	10	10	10	10	10	10	10	10	10	10	10	10	10	10	10	10	10
(5) REDD PROFIT SCENARIOS
Year	2011	2012	2013	2014	2015	2016	2017	2018	2019	2020	2021	2022	2023	2024	2025	2026	2027	2028	2029	2030	2031	2032	2033	2034	2035
Time since establishment (year)	1	2	3	4	5	6	7	8	9	10	11	12	13	14	15	16	17	18	19	20	21	22	23	24	25
(5.1) Carbon profit ($)
Voluntary low case $3	4423.04	-10	-10	-10	-10	-10	-10	-10	-10	-10	-10	-10	-10	-10	-10	-10	-10	-10	-10	-10	-10	-10	-10	-10	-10
Voluntary mid case $7.8	11539.9	-10	-10	-10	-10	-10	-10	-10	-10	-10	-10	-10	-10	-10	-10	-10	-10	-10	-10	-10	-10	-10	-10	-10	-10
Voluntary high case $15	22215.2	-10	-10	-10	-10	-10	-10	-10	-10	-10	-10	-10	-10	-10	-10	-10	-10	-10	-10	-10	-10	-10	-10	-10	-10
Full compliance $30	44455.4	-10	-10	-10	-10	-10	-10	-10	-10	-10	-10	-10	-10	-10	-10	-10	-10	-10	-10	-10	-10	-10	-10	-10	-10
(5.2) REDD net present value (NPV) ($)
Voluntary low case $3	3984.72	-8.11622	-7.31191	-6.58731	-5.93451	-5.34641	-4.81658	-4.33926	-3.90925	-3.52184	-3.17283	-2.85841	-2.57514	-2.31995	-2.09004	-1.88292	-1.69633	-1.52822	-1.37678	-1.24034	-1.11742	-1.00669	-0.906925	-0.81705	-0.736081
Voluntary mid case $7.8	10396.3	-8.11622	-7.31191	-6.58731	-5.93451	-5.34641	-4.81658	-4.33926	-3.90925	-3.52184	-3.17283	-2.85841	-2.57514	-2.31995	-2.09004	-1.88292	-1.69633	-1.52822	-1.37678	-1.24034	-1.11742	-1.00669	-0.906925	-0.81705	-0.736081
Voluntary high case $15	20013.7	-8.11622	-7.31191	-6.58731	-5.93451	-5.34641	-4.81658	-4.33926	-3.90925	-3.52184	-3.17283	-2.85841	-2.57514	-2.31995	-2.09004	-1.88292	-1.69633	-1.52822	-1.37678	-1.24034	-1.11742	-1.00669	-0.906925	-0.81705	-0.736081
Full compliance $30	40049.9	-9.00901	-9.00901	-9.00901	-9.00901	-9.00901	-9.00901	-9.00901	-9.00901	-9.00901	-9.00901	-9.00901	-9.00901	-9.00901	-9.00901	-9.00901	-9.00901	-9.00901	-9.00901	-9.00901	-9.00901	-9.00901	-9.00901	-9.00901	-9.00901
(5.3) Net present value (NPV) accumulation ($)
Voluntary low case $3	3984.72	3976.6	3969.29	3962.71	3956.77	3951.42	3946.61	3942.27	3938.36	3938.36	3938.36	3938.36	3938.36	3938.36	3938.36	3938.36	3938.36	3938.36	3938.36	3938.36	3938.36	3938.36	3938.36	3938.36	3938.36
Voluntary mid case $7.8	10396.3	10388.2	10380.9	10374.3	10368.4	10363	10358.2	10353.9	10349.9	10349.9	10349.9	10349.9	10349.9	10349.9	10349.9	10349.9	10349.9	10349.9	10349.9	10349.9	10349.9	10349.9	10349.9	10349.9	10349.9
Voluntary high case $15	20013.7	20005.6	19998.3	19991.7	19985.7	19980.4	19975.6	19971.2	19967.3	19967.3	19967.3	19967.3	19967.3	19967.3	19967.3	19967.3	19967.3	19967.3	19967.3	19967.3	19967.3	19967.3	19967.3	19967.3	19967.3
Full compliance $30	40049.9	40040.9	40031.9	40022.9	40013.9	40004.9	39995.9	39986.8	39977.8	39977.8	39977.8	39977.8	39977.8	39977.8	39977.8	39977.8	39977.8	39977.8	39977.8	39977.8	39977.8	39977.8	39977.8	39977.8	39977.8
HALF UPFRONT PAYMENT WITH REMAINDER CONSTANT OVER 24 YEARS
Table S1F REDD+ economic model for 450 MgC/ha class
REDD ECONOMIC MODEL (constant price)
Variables	Values
Area (ha)	1
On-site annual deforestation rate	1
Percentage paid out in first year	0.5
Percentage paid out thereafter	0.020833
Discount rate	0.11
Rate of return on investment - rate of inflation
Ave forest biomass carbon (MgC/ha)	450
Ave oil palm biomass carbon (MgC/ha)	46
Net carbon savings through avoided deforestation (MgC/ha)	404
Net carbon emission savings through avoided deforestation (MgCO2e/ha) (MgC/CO2e = 1/3.67 ratio)	1482.68
Annual appreciation for Carbon Financial Instruments (CFI)	0.05
REDD establishment cost ($/ha) (FIXED)	25
REDD annual running cost ($/ha) (FIXED)	10
REDD ECONOMIC MODEL OUTPUTS
Carbon pricing mechansim	NPV ($/ha25yr)	NPV ($/ha1yr)
Voluntary low case $3	2602.82	104.113
Voluntary mid case $7.8	6923.69	276.948
Voluntary high case $15	13405	536.2
Full compliance $30	26907.8	1076.31
REDD (EA) MODELING DETAILS:
(1) AVOIDED EMISSIONS
Year	2011	2012	2013	2014	2015	2016	2017	2018	2019	2020	2021	2022	2023	2024	2025	2026	2027	2028	2029	2030	2031	2032	2033	2034	2035
Time since establishment (year)	1	2	3	4	5	6	7	8	9	10	11	12	13	14	15	16	17	18	19	20	21	22	23	24	25
Avoided emissions (MgCO2e)	741.34	30.8887	30.8887	30.8887	30.8887	30.8887	30.8887	30.8887	30.8887	30.8887	30.8887	30.8887	30.8887	30.8887	30.8887	30.8887	30.8887	30.8887	30.8887	30.8887	30.8887	30.8887	30.8887	30.8887	30.8887
(2) CARBON PRICING MECHANISM
Year	2011	2012	2013	2014	2015	2016	2017	2018	2019	2020	2021	2022	2023	2024	2025	2026	2027	2028	2029	2030	2031	2032	2033	2034	2035
Time since establishment (year)	1	2	3	4	5	6	7	8	9	10	11	12	13	14	15	16	17	18	19	20	21	22	23	24	25
Voluntary low case $3	3	3	3	3	3	3	3	3	3	3	3	3	3	3	3	3	3	3	3	3	3	3	3	3	3
Voluntary mid case $7.8	7.8	7.8	7.8	7.8	7.8	7.8	7.8	7.8	7.8	7.8	7.8	7.8	7.8	7.8	7.8	7.8	7.8	7.8	7.8	7.8	7.8	7.8	7.8	7.8	7.8
Voluntary high case $15	15	15	15	15	15	15	15	15	15	15	15	15	15	15	15	15	15	15	15	15	15	15	15	15	15
Full compliance $30	30	30	30	30	30	30	30	30	30	30	30	30	30	30	30	30	30	30	30	30	30	30	30	30	30
(3) CARBON REVENUE
Year	2011	2012	2013	2014	2015	2016	2017	2018	2019	2020	2021	2022	2023	2024	2025	2026	2027	2028	2029	2030	2031	2032	2033	2034	2035
Time since establishment (year)	1	2	3	4	5	6	7	8	9	10	11	12	13	14	15	16	17	18	19	20	21	22	23	24	25
Voluntary low case $3	2224.02	92.666	92.666	92.666	92.666	92.666	92.666	92.666	92.666	92.666	92.666	92.666	92.666	92.666	92.666	92.666	92.666	92.666	92.666	92.666	92.666	92.666	92.666	92.666	92.666
Voluntary mid case $7.8	5782.45	240.932	240.932	240.932	240.932	240.932	240.932	240.932	240.932	240.932	240.932	240.932	240.932	240.932	240.932	240.932	240.932	240.932	240.932	240.932	240.932	240.932	240.932	240.932	240.932
Voluntary high case $15	11120.1	463.33	463.33	463.33	463.33	463.33	463.33	463.33	463.33	463.33	463.33	463.33	463.33	463.33	463.33	463.33	463.33	463.33	463.33	463.33	463.33	463.33	463.33	463.33	463.33
Full compliance $30	22240.2	926.66	926.66	926.66	926.66	926.66	926.66	926.66	926.66	926.66	926.66	926.66	926.66	926.66	926.66	926.66	926.66	926.66	926.66	926.66	926.66	926.66	926.66	926.66	926.66
(4) REDD COSTS
Year	2011	2012	2013	2014	2015	2016	2017	2018	2019	2020	2021	2022	2023	2024	2025	2026	2027	2028	2029	2030	2031	2032	2033	2034	2035
Time since establishment (year)	1	2	3	4	5	6	7	8	9	10	11	12	13	14	15	16	17	18	19	20	21	22	23	24	25
REDD development and maintenance costs ($)	25	10	10	10	10	10	10	10	10	10	10	10	10	10	10	10	10	10	10	10	10	10	10	10	10
(5) REDD PROFIT SCENARIOS
Year	2011	2012	2013	2014	2015	2016	2017	2018	2019	2020	2021	2022	2023	2024	2025	2026	2027	2028	2029	2030	2031	2032	2033	2034	2035
Time since establishment (year)	1	2	3	4	5	6	7	8	9	10	11	12	13	14	15	16	17	18	19	20	21	22	23	24	25
(5.1) Carbon profit ($)
Voluntary low case $3	2199.02	82.666	82.666	82.666	82.666	82.666	82.666	82.666	82.666	82.666	82.666	82.666	82.666	82.666	82.666	82.666	82.666	82.666	82.666	82.666	82.666	82.666	82.666	82.666	82.666
Voluntary mid case $7.8	5757.45	230.932	230.932	230.932	230.932	230.932	230.932	230.932	230.932	230.932	230.932	230.932	230.932	230.932	230.932	230.932	230.932	230.932	230.932	230.932	230.932	230.932	230.932	230.932	230.932
Voluntary high case $15	11095.1	453.33	453.33	453.33	453.33	453.33	453.33	453.33	453.33	453.33	453.33	453.33	453.33	453.33	453.33	453.33	453.33	453.33	453.33	453.33	453.33	453.33	453.33	453.33	453.33
Full compliance $30	22215.2	916.66	916.66	916.66	916.66	916.66	916.66	916.66	916.66	916.66	916.66	916.66	916.66	916.66	916.66	916.66	916.66	916.66	916.66	916.66	916.66	916.66	916.66	916.66	916.66
(5.2) REDD net present value (NPV) ($)
Voluntary low case $3	1981.1	67.0936	60.4447	54.4547	49.0583	44.1966	39.8168	35.871	32.3162	29.1137	26.2285	23.6293	21.2877	19.1781	17.2776	15.5654	14.0229	12.6332	11.3813	10.2534	9.23729	8.32188	7.49719	6.75422	6.08489
Voluntary mid case $7.8	5186.89	187.429	168.855	152.122	137.047	123.465	111.23	100.207	90.2769	81.3305	73.2708	66.0097	59.4682	53.5749	48.2657	43.4826	39.1735	35.2915	31.7941	28.6434	25.8048	23.2476	20.9438	18.8683	16.9984
Voluntary high case $15	9995.59	367.933	331.471	298.623	269.029	242.369	218.35	196.712	177.218	159.656	143.834	129.58	116.739	105.17	94.748	85.3585	76.8996	69.2789	62.4134	56.2283	50.6561	45.6362	41.1136	37.0393	33.3688
Full compliance $30	20013.7	743.982	670.254	603.832	543.993	490.084	441.517	397.763	358.345	322.833	290.841	262.019	236.053	212.66	191.586	172.6	155.495	140.086	126.204	113.697	102.43	92.279	83.1342	74.8957	67.4736
(5.3) Net present value (NPV) accumulation ($)
Voluntary low case $3	1981.1	2048.19	2108.64	2163.09	2212.15	2256.35	2296.16	2332.03	2364.35	2393.46	2419.69	2443.32	2464.61	2483.79	2501.07	2516.63	2530.65	2543.29	2554.67	2564.92	2574.16	2582.48	2589.98	2596.73	2602.82
Voluntary mid case $7.8	5186.89	5374.32	5543.18	5695.3	5832.35	5955.81	6067.04	6167.25	6257.53	6338.86	6412.13	6478.14	6537.61	6591.18	6639.45	6682.93	6722.1	6757.39	6789.19	6817.83	6843.64	6866.88	6887.83	6906.7	6923.69
Voluntary high case $15	9995.59	10363.5	10695	10993.6	11262.6	11505	11723.4	11920.1	12097.3	12256.9	12400.8	12530.4	12647.1	12752.3	12847	12932.4	13009.3	13078.6	13141	13197.2	13247.9	13293.5	13334.6	13371.6	13405
Full compliance $30	20013.7	20757.7	21427.9	22031.8	22575.8	23065.8	23507.4	23905.1	24263.5	24586.3	24877.1	25139.2	25375.2	25587.9	25779.5	25952.1	26107.6	26247.6	26373.8	26487.5	26590	26682.2	26765.4	26840.3	26907.8

## Sheet: Table S1G_Coarse-scale
FULL UPFRONT PAYMENT
Table S1G REDD+ economic model for 156 MgC/ha class
REDD ECONOMIC MODEL (constant price)
Variables	Values
Unprotected area (ha)	30173
Annual deforestation rate (actual = 8.57% but we use 20%)	1
Conversion period (years) (actual = 11.66 years but we use 5 years)	1
Discount rate	0.11
Rate of return on investment - rate of inflation
Ave forest biomass carbon (MgC/ha)	156
Ave oil palm biomass carbon (MgC/ha)	52
Net carbon savings through avoided deforestation (MgC/ha)	104
Net carbon emission savings through avoided deforestation (MgCO2e/ha) (MgC/CO2e = 1/3.67 ratio)	381.68	572.52
Annual appreciation for Carbon Financial Instruments (CFI)	0.05
ONE OFF REDD establishment cost ($/ha) (FIXED)	25	754325
ANNUAL REDD running cost ($/ha) (FIXED)	10	301730
REDD ECONOMIC MODEL OUTPUTS
Carbon pricing mechansim	NPV ($/ha25yr)	NPV ($/ha1yr)
Voluntary low case $3 per CO2e	933.837	37.3535
Voluntary mid case $7.8 per CO2e	2584.34	103.374
Voluntary high case $15 per CO2e	5060.11	202.404
Full compliance $30 per CO2e	10217.9	408.718
REDD (EA) MODELING DETAILS:
(1) AVOIDED EMISSIONS
Year	2011	2012	2013	2014	2015	2016	2017	2018	2019	2020	2021	2022	2023	2024	2025	2026	2027	2028	2029	2030	2031	2032	2033	2034	2035
Time since establishment (year)	1	2	3	4	5	6	7	8	9	10	11	12	13	14	15	16	17	18	19	20	21	22	23	24	25
Avoided emissions (MgCO2e)	1.15164e+07	0	0	0	0	0	0	0	0	0	0	0	0	0	0	0	0	0	0	0	0	0	0	0	0
(2) CARBON PRICING MECHANISM
Year	2011	2012	2013	2014	2015	2016	2017	2018	2019	2020	2021	2022	2023	2024	2025	2026	2027	2028	2029	2030	2031	2032	2033	2034	2035
Time since establishment (year)	1	2	3	4	5	6	7	8	9	10	11	12	13	14	15	16	17	18	19	20	21	22	23	24	25
Voluntary low case $3	3	3	3	3	3	3	3	3	3	3	3	3	3	3	3	3	3	3	3	3	3	3	3	3	3
Voluntary mid case $7.8	7.8	7.8	7.8	7.8	7.8	7.8	7.8	7.8	7.8	7.8	7.8	7.8	7.8	7.8	7.8	7.8	7.8	7.8	7.8	7.8	7.8	7.8	7.8	7.8	7.8
Voluntary high case $15	15	15	15	15	15	15	15	15	15	15	15	15	15	15	15	15	15	15	15	15	15	15	15	15	15
Full compliance $30	30	30	30	30	30	30	30	30	30	30	30	30	30	30	30	30	30	30	30	30	30	30	30	30	30
(3) CARBON REVENUE
Year	2011	2012	2013	2014	2015	2016	2017	2018	2019	2020	2021	2022	2023	2024	2025	2026	2027	2028	2029	2030	2031	2032	2033	2034	2035
Time since establishment (year)	1	2	3	4	5	6	7	8	9	10	11	12	13	14	15	16	17	18	19	20	21	22	23	24	25
Voluntary low case $3	3.45493e+07	0	0	0	0	0	0	0	0	0	0	0	0	0	0	0	0	0	0	0	0	0	0	0	0
Voluntary mid case $7.8	8.98282e+07	0	0	0	0	0	0	0	0	0	0	0	0	0	0	0	0	0	0	0	0	0	0	0	0
Voluntary high case $15	1.72746e+08	0	0	0	0	0	0	0	0	0	0	0	0	0	0	0	0	0	0	0	0	0	0	0	0
Full compliance $30	3.45493e+08	0	0	0	0	0	0	0	0	0	0	0	0	0	0	0	0	0	0	0	0	0	0	0	0
(4) REDD COSTS
Year	2011	2012	2013	2014	2015	2016	2017	2018	2019	2020	2021	2022	2023	2024	2025	2026	2027	2028	2029	2030	2031	2032	2033	2034	2035
Time since establishment (year)	1	2	3	4	5	6	7	8	9	10	11	12	13	14	15	16	17	18	19	20	21	22	23	24	25
REDD development and maintenance costs ($)	754325	301730	301730	301730	301730	301730	301730	301730	301730	301730	301730	301730	301730	301730	301730	301730	301730	301730	301730	301730	301730	301730	301730	301730	301730
(5) REDD PROFIT SCENARIOS
Year	2011	2012	2013	2014	2015	2016	2017	2018	2019	2020	2021	2022	2023	2024	2025	2026	2027	2028	2029	2030	2031	2032	2033	2034	2035
Time since establishment (year)	1	2	3	4	5	6	7	8	9	10	11	12	13	14	15	16	17	18	19	20	21	22	23	24	25
(5.1) Carbon profit ($)
Voluntary low case $3	3.3795e+07	-301730	-301730	-301730	-301730	-301730	-301730	-301730	-301730	-301730	-301730	-301730	-301730	-301730	-301730	-301730	-301730	-301730	-301730	-301730	-301730	-301730	-301730	-301730	-301730
Voluntary mid case $7.8	8.90738e+07	-301730	-301730	-301730	-301730	-301730	-301730	-301730	-301730	-301730	-301730	-301730	-301730	-301730	-301730	-301730	-301730	-301730	-301730	-301730	-301730	-301730	-301730	-301730	-301730
Voluntary high case $15	1.71992e+08	-301730	-301730	-301730	-301730	-301730	-301730	-301730	-301730	-301730	-301730	-301730	-301730	-301730	-301730	-301730	-301730	-301730	-301730	-301730	-301730	-301730	-301730	-301730	-301730
Full compliance $30	3.44739e+08	-301730	-301730	-301730	-301730	-301730	-301730	-301730	-301730	-301730	-301730	-301730	-301730	-301730	-301730	-301730	-301730	-301730	-301730	-301730	-301730	-301730	-301730	-301730	-301730
(5.2) REDD net present value (NPV) ($)
Voluntary low case $3	3.04459e+07	-244891	-220622	-198759	-179062	-161317	-145331	-130929	-117954	-106265	-95733.9	-86246.8	-77699.8	-69999.8	-63062.9	-56813.4	-51183.2	-46111	-41541.5	-37424.8	-33716	-30374.8	-27364.7	-24652.8	-22209.8
Voluntary mid case $7.8	8.02467e+07	-244891	-220622	-198759	-179062	-161317	-145331	-130929	-117954	-106265	-95733.9	-86246.8	-77699.8	-69999.8	-63062.9	-56813.4	-51183.2	-46111	-41541.5	-37424.8	-33716	-30374.8	-27364.7	-24652.8	-22209.8
Voluntary high case $15	1.54948e+08	-244891	-220622	-198759	-179062	-161317	-145331	-130929	-117954	-106265	-95733.9	-86246.8	-77699.8	-69999.8	-63062.9	-56813.4	-51183.2	-46111	-41541.5	-37424.8	-33716	-30374.8	-27364.7	-24652.8	-22209.8
Full compliance $30	3.10575e+08	-271829	-271829	-271829	-271829	-271829	-271829	-271829	-271829	-271829	-271829	-271829	-271829	-271829	-271829	-271829	-271829	-271829	-271829	-271829	-271829	-271829	-271829	-271829	-271829
(5.3) Net present value (NPV) accumulation ($)
Voluntary low case $3	3.04459e+07	3.0201e+07	2.99804e+07	2.97816e+07	2.96026e+07	2.94413e+07	2.92959e+07	2.9165e+07	2.90471e+07	2.90471e+07	2.90471e+07	2.90471e+07	2.90471e+07	2.90471e+07	2.90471e+07	2.90471e+07	2.90471e+07	2.90471e+07	2.90471e+07	2.90471e+07	2.90471e+07	2.90471e+07	2.90471e+07	2.90471e+07	2.90471e+07
Voluntary mid case $7.8	8.02467e+07	8.00018e+07	7.97812e+07	7.95824e+07	7.94034e+07	7.9242e+07	7.90967e+07	7.89658e+07	7.88478e+07	7.88478e+07	7.88478e+07	7.88478e+07	7.88478e+07	7.88478e+07	7.88478e+07	7.88478e+07	7.88478e+07	7.88478e+07	7.88478e+07	7.88478e+07	7.88478e+07	7.88478e+07	7.88478e+07	7.88478e+07	7.88478e+07
Voluntary high case $15	1.54948e+08	1.54703e+08	1.54482e+08	1.54284e+08	1.54105e+08	1.53943e+08	1.53798e+08	1.53667e+08	1.53549e+08	1.53549e+08	1.53549e+08	1.53549e+08	1.53549e+08	1.53549e+08	1.53549e+08	1.53549e+08	1.53549e+08	1.53549e+08	1.53549e+08	1.53549e+08	1.53549e+08	1.53549e+08	1.53549e+08	1.53549e+08	1.53549e+08
Full compliance $30	3.10575e+08	3.10303e+08	3.10032e+08	3.0976e+08	3.09488e+08	3.09216e+08	3.08944e+08	3.08673e+08	3.08401e+08	3.08401e+08	3.08401e+08	3.08401e+08	3.08401e+08	3.08401e+08	3.08401e+08	3.08401e+08	3.08401e+08	3.08401e+08	3.08401e+08	3.08401e+08	3.08401e+08	3.08401e+08	3.08401e+08	3.08401e+08	3.08401e+08
HALF UPFRONT PAYMENT WITH REMAINDER CONSTANT OVER 24 YEARS
Table S1G REDD+ economic model for 156 MgC/ha class
REDD ECONOMIC MODEL (constant price)
Variables	Values
Unprotected area (ha)	30173
Annual deforestation rate (actual = 8.57% but we use 20%)	1
Percentage paid out in first year	0.5
Percentage paid out thereafter	0.020833
Discount rate	0.11
Rate of return on investment - rate of inflation
Ave forest biomass carbon (MgC/ha)	156
Ave oil palm biomass carbon (MgC/ha)	52
Net carbon savings through avoided deforestation (MgC/ha)	104
Net carbon emission savings through avoided deforestation (MgCO2e/ha) (MgC/CO2e = 1/3.67 ratio)	381.68	572.52
Annual appreciation for Carbon Financial Instruments (CFI)	0.05
ONE OFF REDD establishment cost ($/ha) (FIXED)	25	754325
ANNUAL REDD running cost ($/ha) (FIXED)	10	301730
REDD ECONOMIC MODEL OUTPUTS
Carbon pricing mechansim	NPV ($/ha25yr)	NPV ($/ha1yr)
Voluntary low case $3 per CO2e	597.46	23.8984
Voluntary mid case $7.8 per CO2e	1709.76	68.3906
Voluntary high case $15 per CO2e	3378.22	135.129
Full compliance $30 per CO2e	6854.18	274.167
REDD (EA) MODELING DETAILS:
(1) AVOIDED EMISSIONS
Year	2011	2012	2013	2014	2015	2016	2017	2018	2019	2020	2021	2022	2023	2024	2025	2026	2027	2028	2029	2030	2031	2032	2033	2034	2035
Time since establishment (year)	1	2	3	4	5	6	7	8	9	10	11	12	13	14	15	16	17	18	19	20	21	22	23	24	25
Avoided emissions (MgCO2e)	5.75822e+06	239922	239922	239922	239922	239922	239922	239922	239922	239922	239922	239922	239922	239922	239922	239922	239922	239922	239922	239922	239922	239922	239922	239922	239922
(2) CARBON PRICING MECHANISM
Year	2011	2012	2013	2014	2015	2016	2017	2018	2019	2020	2021	2022	2023	2024	2025	2026	2027	2028	2029	2030	2031	2032	2033	2034	2035
Time since establishment (year)	1	2	3	4	5	6	7	8	9	10	11	12	13	14	15	16	17	18	19	20	21	22	23	24	25
Voluntary low case $3	3	3	3	3	3	3	3	3	3	3	3	3	3	3	3	3	3	3	3	3	3	3	3	3	3
Voluntary mid case $7.8	7.8	7.8	7.8	7.8	7.8	7.8	7.8	7.8	7.8	7.8	7.8	7.8	7.8	7.8	7.8	7.8	7.8	7.8	7.8	7.8	7.8	7.8	7.8	7.8	7.8
Voluntary high case $15	15	15	15	15	15	15	15	15	15	15	15	15	15	15	15	15	15	15	15	15	15	15	15	15	15
Full compliance $30	30	30	30	30	30	30	30	30	30	30	30	30	30	30	30	30	30	30	30	30	30	30	30	30	30
(3) CARBON REVENUE
Year	2011	2012	2013	2014	2015	2016	2017	2018	2019	2020	2021	2022	2023	2024	2025	2026	2027	2028	2029	2030	2031	2032	2033	2034	2035
Time since establishment (year)	1	2	3	4	5	6	7	8	9	10	11	12	13	14	15	16	17	18	19	20	21	22	23	24	25
Voluntary low case $3	1.72746e+07	719765	719765	719765	719765	719765	719765	719765	719765	719765	719765	719765	719765	719765	719765	719765	719765	719765	719765	719765	719765	719765	719765	719765	719765
Voluntary mid case $7.8	4.49141e+07	1.87139e+06	1.87139e+06	1.87139e+06	1.87139e+06	1.87139e+06	1.87139e+06	1.87139e+06	1.87139e+06	1.87139e+06	1.87139e+06	1.87139e+06	1.87139e+06	1.87139e+06	1.87139e+06	1.87139e+06	1.87139e+06	1.87139e+06	1.87139e+06	1.87139e+06	1.87139e+06	1.87139e+06	1.87139e+06	1.87139e+06	1.87139e+06
Voluntary high case $15	8.63732e+07	3.59883e+06	3.59883e+06	3.59883e+06	3.59883e+06	3.59883e+06	3.59883e+06	3.59883e+06	3.59883e+06	3.59883e+06	3.59883e+06	3.59883e+06	3.59883e+06	3.59883e+06	3.59883e+06	3.59883e+06	3.59883e+06	3.59883e+06	3.59883e+06	3.59883e+06	3.59883e+06	3.59883e+06	3.59883e+06	3.59883e+06	3.59883e+06
Full compliance $30	1.72746e+08	7.19765e+06	7.19765e+06	7.19765e+06	7.19765e+06	7.19765e+06	7.19765e+06	7.19765e+06	7.19765e+06	7.19765e+06	7.19765e+06	7.19765e+06	7.19765e+06	7.19765e+06	7.19765e+06	7.19765e+06	7.19765e+06	7.19765e+06	7.19765e+06	7.19765e+06	7.19765e+06	7.19765e+06	7.19765e+06	7.19765e+06	7.19765e+06
(4) REDD COSTS
Year	2011	2012	2013	2014	2015	2016	2017	2018	2019	2020	2021	2022	2023	2024	2025	2026	2027	2028	2029	2030	2031	2032	2033	2034	2035
Time since establishment (year)	1	2	3	4	5	6	7	8	9	10	11	12	13	14	15	16	17	18	19	20	21	22	23	24	25
REDD development and maintenance costs ($)	754325	301730	301730	301730	301730	301730	301730	301730	301730	301730	301730	301730	301730	301730	301730	301730	301730	301730	301730	301730	301730	301730	301730	301730	301730
(5) REDD PROFIT SCENARIOS
Year	2011	2012	2013	2014	2015	2016	2017	2018	2019	2020	2021	2022	2023	2024	2025	2026	2027	2028	2029	2030	2031	2032	2033	2034	2035
Time since establishment (year)	1	2	3	4	5	6	7	8	9	10	11	12	13	14	15	16	17	18	19	20	21	22	23	24	25
(5.1) Carbon profit ($)
Voluntary low case $3	1.65203e+07	418035	418035	418035	418035	418035	418035	418035	418035	418035	418035	418035	418035	418035	418035	418035	418035	418035	418035	418035	418035	418035	418035	418035	418035
Voluntary mid case $7.8	4.41598e+07	1.56966e+06	1.56966e+06	1.56966e+06	1.56966e+06	1.56966e+06	1.56966e+06	1.56966e+06	1.56966e+06	1.56966e+06	1.56966e+06	1.56966e+06	1.56966e+06	1.56966e+06	1.56966e+06	1.56966e+06	1.56966e+06	1.56966e+06	1.56966e+06	1.56966e+06	1.56966e+06	1.56966e+06	1.56966e+06	1.56966e+06	1.56966e+06
Voluntary high case $15	8.56189e+07	3.2971e+06	3.2971e+06	3.2971e+06	3.2971e+06	3.2971e+06	3.2971e+06	3.2971e+06	3.2971e+06	3.2971e+06	3.2971e+06	3.2971e+06	3.2971e+06	3.2971e+06	3.2971e+06	3.2971e+06	3.2971e+06	3.2971e+06	3.2971e+06	3.2971e+06	3.2971e+06	3.2971e+06	3.2971e+06	3.2971e+06	3.2971e+06
Full compliance $30	1.71992e+08	6.89592e+06	6.89592e+06	6.89592e+06	6.89592e+06	6.89592e+06	6.89592e+06	6.89592e+06	6.89592e+06	6.89592e+06	6.89592e+06	6.89592e+06	6.89592e+06	6.89592e+06	6.89592e+06	6.89592e+06	6.89592e+06	6.89592e+06	6.89592e+06	6.89592e+06	6.89592e+06	6.89592e+06	6.89592e+06	6.89592e+06	6.89592e+06
(5.2) REDD net present value (NPV) ($)
Voluntary low case $3	1.48832e+07	339287	305664	275373	248084	223499	201350	181397	163420	147226	132636	119492	107650	96982	87371.2	78712.8	70912.4	63885.1	57554.1	51850.6	46712.2	42083.1	37912.7	34155.6	30770.8
Voluntary mid case $7.8	3.97836e+07	1.27397e+06	1.14772e+06	1.03398e+06	931517	839204	756040	681117	613619	552810	498027	448673	404210	364153	328066	295555	266266	239879	216107	194691	175397	158016	142356	128249	115540
Voluntary high case $15	7.71341e+07	2.676e+06	2.41081e+06	2.1719e+06	1.95667e+06	1.76276e+06	1.58807e+06	1.4307e+06	1.28892e+06	1.16119e+06	1.04611e+06	942445	849049	764909	689108	620818	559295	503870	453937	408952	368425	331914	299022	269389	242693
Full compliance $30	1.54948e+08	5.59689e+06	5.04224e+06	4.54256e+06	4.0924e+06	3.68684e+06	3.32148e+06	2.99232e+06	2.69579e+06	2.42864e+06	2.18796e+06	1.97114e+06	1.7758e+06	1.59982e+06	1.44128e+06	1.29845e+06	1.16977e+06	1.05385e+06	949415	855328	770566	694204	625409	563431	507596
(5.3) Net present value (NPV) accumulation ($)
Voluntary low case $3	1.48832e+07	1.52225e+07	1.55281e+07	1.58035e+07	1.60516e+07	1.62751e+07	1.64764e+07	1.66578e+07	1.68212e+07	1.69685e+07	1.71011e+07	1.72206e+07	1.73282e+07	1.74252e+07	1.75126e+07	1.75913e+07	1.76622e+07	1.77261e+07	1.77837e+07	1.78355e+07	1.78822e+07	1.79243e+07	1.79622e+07	1.79964e+07	1.80272e+07
Voluntary mid case $7.8	3.97836e+07	4.10575e+07	4.22053e+07	4.32392e+07	4.41708e+07	4.501e+07	4.5766e+07	4.64471e+07	4.70607e+07	4.76135e+07	4.81116e+07	4.85602e+07	4.89645e+07	4.93286e+07	4.96567e+07	4.99522e+07	5.02185e+07	5.04584e+07	5.06745e+07	5.08692e+07	5.10446e+07	5.12026e+07	5.13449e+07	5.14732e+07	5.15887e+07
Voluntary high case $15	7.71341e+07	7.98101e+07	8.2221e+07	8.43929e+07	8.63495e+07	8.81123e+07	8.97004e+07	9.11311e+07	9.242e+07	9.35812e+07	9.46273e+07	9.55697e+07	9.64188e+07	9.71837e+07	9.78728e+07	9.84936e+07	9.90529e+07	9.95568e+07	1.00011e+08	1.0042e+08	1.00788e+08	1.0112e+08	1.01419e+08	1.01688e+08	1.01931e+08
Full compliance $30	1.54948e+08	1.60545e+08	1.65587e+08	1.7013e+08	1.74222e+08	1.77909e+08	1.8123e+08	1.84223e+08	1.86918e+08	1.89347e+08	1.91535e+08	1.93506e+08	1.95282e+08	1.96882e+08	1.98323e+08	1.99621e+08	2.00791e+08	2.01845e+08	2.02795e+08	2.0365e+08	2.0442e+08	2.05115e+08	2.0574e+08	2.06303e+08	2.06811e+08

## Sheet: Table S1H_Sensitivity analyses
UPFRONT PAYMENT
11% Dicount Rate & Upfront Payment (Oil palm NPV = $594)									5% Dicount Rate & Upfront Payment (Oil palm NPV = $1,206)									8% Dicount Rate & Upfront Payment (Oil palm NPV = $836)									14% Dicount Rate & Upfront Payment (Oil palm NPV = $429)
REDD+ NPV vs Full stand (46 MgC/ha) NPV (US$ 594/ha)									REDD+ NPV vs Full stand (46 MgC/ha)									REDD+ NPV vs Full stand (46 MgC/ha)									REDD+ NPV vs Full stand (46 MgC/ha)
Carbon pricing mechansim	25 MgC	75 MgC	150 MgC	250 MgC	350 MgC	450 MgC	Ave. (156 MgC)		Carbon pricing mechansim	25 MgC	75 MgC	150 MgC	250 MgC	350 MgC	450 MgC	Ave. (156 MgC)		Carbon pricing mechansim	25 MgC	75 MgC	150 MgC	250 MgC	350 MgC	450 MgC	Ave. (156 MgC)		Carbon pricing mechansim	25 MgC	75 MgC	150 MgC	250 MgC	350 MgC	450 MgC	Ave. (156 MgC)
Voluntary low case $3	-12.2411	7.59671	37.3535	77.0291	116.705	156			Voluntary low case $3	-15	6	37	79	121	163			Voluntary low case $3	-13	7	38	78	119	160			Voluntary low case $3	-11	8	37	76	114	153
Voluntary mid case $7.8	-25.5722	26.0062	103.374	206.531	309.687	413			Voluntary mid case $7.8	-29	25	107	216	325	434			Voluntary mid case $7.8	-27	26	105	211	317	424			Voluntary mid case $7.8	-24	26	101	202	302	403
Voluntary high case $15	-45.5687	53.6205	202.404	400.783	599.161	798			Voluntary high case $15	-50	55	212	422	631	841			Voluntary high case $15	-48	54	207	411	615	819			Voluntary high case $15	-44	53	198	391	584	777
Full compliance $30	-87.2282	111.15	408.718	805.475	1202.23	1599			Full compliance $30	-94	115	430	849	1269	1688			Full compliance $30	-90	113	419	827	1235	1643			Full compliance $30	-84	109	398	785	1171	1557
11% Dicount Rate & Upfront Payment (Oil palm NPV = $125)									5% Dicount Rate & Upfront Payment (Oil palm NPV = $327)									8% Dicount Rate & Upfront Payment (Oil palm NPV = $205)									14% Dicount Rate & Upfront Payment (Oil palm NPV = $72)
REDD+ NPV vs Underproductive at 50% (20 MgC/ha) NPV (US$ 125/ha)									REDD+ NPV vs Underproductive at 50% (20 MgC/ha)									REDD+ NPV vs Underproductive at 50% (20 MgC/ha)									REDD+ NPV vs Underproductive at 50% (20 MgC/ha)
Carbon pricing mechansim	25 MgC	75 MgC	150 MgC	250 MgC	350 MgC	450 MgC	Ave. (156 MgC)		Carbon pricing mechansim	25 MgC	75 MgC	150 MgC	250 MgC	350 MgC	450 MgC	Ave. (156 MgC)		Carbon pricing mechansim	25 MgC	75 MgC	150 MgC	250 MgC	350 MgC	450 MgC	Ave. (156 MgC)		Carbon pricing mechansim	25 MgC	75 MgC	150 MgC	250 MgC	350 MgC	450 MgC	Ave. (156 MgC)
Voluntary low case $3	-1.92545	17.9124	47.6691	87.3448	127.02	166.696			Voluntary low case $3	-4	17	48	90	132	174			Voluntary low case $3	-3	18	48	89	130	171			Voluntary low case $3	-1	18	47	86	124	163
Voluntary mid case $7.8	1.2486	52.827	130.195	233.351	336.508	439.665			Voluntary mid case $7.8	-1	54	136	245	354	463			Voluntary mid case $7.8	0	53	133	239	345	451			Voluntary mid case $7.8	2	52	127	228	328	429
Voluntary high case $15	6.00968	105.199	253.983	452.361	650.739	849.118			Voluntary high case $15	4	109	266	476	686	896			Voluntary high case $15	5	107	260	464	668	872			Voluntary high case $15	6	103	248	441	634	827
Full compliance $30	15.9286	214.307	511.875	908.631	1305.39	1702.14			Full compliance $30	15	224	539	958	1378	1797			Full compliance $30	16	219	525	933	1341	1749			Full compliance $30	16	209	499	885	1272	1658
11% Dicount Rate & Upfront Payment (Oil palm NPV = -$109)									5% Dicount Rate & Upfront Payment (Oil palm NPV = -$112)									8% Dicount Rate & Upfront Payment (Oil palm NPV = -$110)									14% Dicount Rate & Upfront Payment (Oil palm NPV = -$107)
REDD+ NPV vs Underproductive at 25% (7 MgC/ha) NPV (US$ -109/ha)									REDD+ NPV vs Underproductive at 25% (7 MgC/ha)									REDD+ NPV vs Underproductive at 25% (7 MgC/ha)									REDD+ NPV vs Underproductive at 25% (7 MgC/ha)
Carbon pricing mechansim	25 MgC	75 MgC	150 MgC	250 MgC	350 MgC	450 MgC	Ave. (156 MgC)		Carbon pricing mechansim	25 MgC	75 MgC	150 MgC	250 MgC	350 MgC	450 MgC	Ave. (156 MgC)		Carbon pricing mechansim	25 MgC	75 MgC	150 MgC	250 MgC	350 MgC	450 MgC	Ave. (156 MgC)		Carbon pricing mechansim	25 MgC	75 MgC	150 MgC	250 MgC	350 MgC	450 MgC	Ave. (156 MgC)
Voluntary low case $3	3.23238	23.0702	52.827	92.5027	132.178	171.854			Voluntary low case $3	1	22	54	96	138	180			Voluntary low case $3	3	28	53	94	135	176			Voluntary low case $3	4	23	52	91	129	168
Voluntary mid case $7.8	14.659	66.2374	143.605	246.762	349.918	453.075			Voluntary mid case $7.8	13	68	150	259	368	477			Voluntary mid case $7.8	14	67	147	250	359	465			Voluntary mid case $7.8	15	65	140	241	341	442
Voluntary high case $15	31.7989	130.988	279.772	478.15	676.529	874.907			Voluntary high case $15	32	136	294	503	713	923			Voluntary high case $15	32	134	287	491	695	898			Voluntary high case $15	31	128	273	466	659	852
Full compliance $30	67.507	265.885	563.453	960.21	1356.97	1753.72			Full compliance $30	69	279	594	1013	1432	1852			Full compliance $30	69	272	578	986	1394	1802			Full compliance $30	66	259	549	935	1322	1788
STAGGERED PAYMENT
11% Dicount Rate & Staggered Payment (Oil palm NPV = $594)									5% Dicount Rate & Staggered Payment (Oil palm NPV = $1,206)									8% Dicount Rate & Staggered payment (Oil palm NPV = $836)									14% Dicount Rate & Staggered payment(Oil palm NPV = $429)
REDD+ NPV vs Full stand (46 MgC/ha) NPV (US$ 594/ha)									REDD+ NPV vs Full stand (46 MgC/ha)									REDD+ NPV vs Full stand (46 MgC/ha)									REDD+ NPV vs Full stand (46 MgC/ha)
Carbon pricing mechansim	25 MgC	75 MgC	150 MgC	250 MgC	350 MgC	450 MgC	Ave. (156 MgC)		Carbon pricing mechansim	25 MgC	75 MgC	150 MgC	250 MgC	350 MgC	450 MgC	Ave. (156 MgC)		Carbon pricing mechansim	25 MgC	75 MgC	150 MgC	250 MgC	350 MgC	450 MgC	Ave. (156 MgC)		Carbon pricing mechansim	25 MgC	75 MgC	150 MgC	250 MgC	350 MgC	450 MgC	Ave. (156 MgC)
Voluntary low case $3	-10	4	24	51	77	104			Voluntary low case $3	-13	3	28	61	94	127			Voluntary low case $3	-11	4	26	55	84	114			Voluntary low case $3	-8	4	23	47	72	97
Voluntary mid case $7.8	-19	16	68	138	207	277			Voluntary mid case $7.8	-24	19	83	169	255	341			Voluntary mid case $7.8	-21	17	74	151	227	303			Voluntary mid case $7.8	-17	15	64	128	192	257
Voluntary high case $15	-32	35	135	269	403	536			Voluntary high case $15	-41	42	166	331	496	661			Voluntary high case $15	-36	38	148	294	441	588			Voluntary high case $15	-29	33	126	250	374	498
Full compliance $30	-60	74	274	542	809	1076			Full compliance $30	-76	90	337	668	998	1328			Full compliance $30	-66	80	308	594	887	1180			Full compliance $30	-55	69	255	503	751	999
11% Dicount Rate & Staggered Payment (Oil palm NPV = $125)									5% Dicount Rate & Staggered payment (Oil palm NPV = $327)									8% Dicount Rate & Staggered payment (Oil palm NPV = $205)									14% Dicount Rate & Staggered Payment (Oil palm NPV = $72)
REDD+ NPV vs Underproductive at 50% (20 MgC/ha) NPV (US$ 125/ha)									REDD+ NPV vs Underproductive at 50% (20 MgC/ha)									REDD+ NPV vs Underproductive at 50% (20 MgC/ha)									REDD+ NPV vs Underproductive at 50% (20 MgC/ha)
Carbon pricing mechansim	25 MgC	75 MgC	150 MgC	250 MgC	350 MgC	450 MgC	Ave. (156 MgC)		Carbon pricing mechansim	25 MgC	75 MgC	150 MgC	250 MgC	350 MgC	450 MgC	Ave. (156 MgC)		Carbon pricing mechansim	25 MgC	75 MgC	150 MgC	250 MgC	350 MgC	450 MgC	Ave. (156 MgC)		Carbon pricing mechansim	25 MgC	75 MgC	150 MgC	250 MgC	350 MgC	450 MgC	Ave. (156 MgC)
Voluntary low case $3	-3	11	31	58	84	111			Voluntary low case $3	-5	12	37	70	103	136			Voluntary low case $3	-3	11	33	63	92	121			Voluntary low case $3	-2	10	29	54	79	103
Voluntary mid case $7.8	0	34	86	156	226	295			Voluntary mid case $7.8	-2	41	105	191	277	363			Voluntary mid case $7.8	1	37	94	171	249	323			Voluntary mid case $7.8	0	32	81	145	210	274
Voluntary high case $15	3	70	170	304	437	571			Voluntary high case $15	2	85	208	374	539	704			Voluntary high case $15	3	76	186	333	479	626			Voluntary high case $15	3	65	158	282	406	530
Full compliance $30	9	143	344	611	878	1146			Full compliance $30	10	175	423	753	1084	1414			Full compliance $30	10	157	377	670	963	1257			Full compliance $30	9	133	319	568	816	1064
11% Dicount Rate & Staggered Payment (Oil palm NPV = -$109)									5% Dicount Rate & Staggered Payment (Oil palm NPV = -$112)									8% Dicount Rate & Staggered payment (Oil palm NPV = -$110)									14% Dicount Rate & Staggered Payment (Oil palm NPV = -$107)
REDD+ NPV vs Underproductive at 25% (7 MgC/ha) NPV (US$ -109/ha)									REDD+ NPV vs Underproductive at 25% (7 MgC/ha)									REDD+ NPV vs Underproductive at 25% (7 MgC/ha)									REDD+ NPV vs Underproductive at 25% (7 MgC/ha)
Carbon pricing mechansim	25 MgC	75 MgC	150 MgC	250 MgC	350 MgC	450 MgC	Ave. (156 MgC)		Carbon pricing mechansim	25 MgC	75 MgC	150 MgC	250 MgC	350 MgC	450 MgC	Ave. (156 MgC)		Carbon pricing mechansim	25 MgC	75 MgC	150 MgC	250 MgC	350 MgC	450 MgC	Ave. (156 MgC)		Carbon pricing mechansim	25 MgC	75 MgC	150 MgC	250 MgC	350 MgC	450 MgC	Ave. (156 MgC)
Voluntary low case $3	1	14	34	61	88	115			Voluntary low case $3	0	16	41	74	107	140			Voluntary low case $3	0	15	37	66	96	125			Voluntary low case $3	1	14	32	57	82	107
Voluntary mid case $7.8	9	43	96	165	235	304			Voluntary mid case $7.8	9	52	117	202	288	374			Voluntary mid case $7.8	9	47	104	181	257	333			Voluntary mid case $7.8	8	41	89	154	218	283
Voluntary high case $15	20	87	187	321	455	588			Voluntary high case $15	24	106	230	395	560	725			Voluntary high case $15	22	95	205	352	498	645			Voluntary high case $15	19	81	174	298	422	546
Full compliance $30	44	178	378	646	913	1181			Full compliance $30	53	218	466	796	1127	1457			Full compliance $30	48	195	415	708	1001	1295			Full compliance $30	41	165	352	600	848	1096
CARBON CALCULATIONS FOR UPFRONT PAYMENT
Full stand & 11% Dicount Rate & Upfront Payment									Full stand & 5% Dicount Rate & Upfront Payment									Full stand & 8% Dicount Rate & Upfront Payment									Full stand & 14% Dicount Rate & Upfront Payment
Hectares per class of MgC within the HIGH SUITABILITY CLASS (Full stand) suitability classess									Hectares per class of MgC within the MEDIUM SUITABILITY CLASS (U50%) suitability classess									Hectares per class of MgC within the MEDIUM SUITABILITY CLASS (U50%) suitability classess									Hectares per class of MgC within the MEDIUM SUITABILITY CLASS (U50%) suitability classess
Carbon pricing mechansim	25 MgC	75 MgC	150 MgC	250 MgC	350 MgC	450 MgC	REDD+ NPV higher		Carbon pricing mechansim	25 MgC	75 MgC	150 MgC	250 MgC	350 MgC	450 MgC	REDD+ NPV higher		Carbon pricing mechansim	25 MgC	75 MgC	150 MgC	250 MgC	350 MgC	450 MgC	REDD+ NPV higher		Carbon pricing mechansim	25 MgC	75 MgC	150 MgC	250 MgC	350 MgC	450 MgC	REDD+ NPV higher
Voluntary low case $3	145	1100	5455	1319	935	442	0		Voluntary low case $3	145	1100	5455	1319	935	442	0		Voluntary low case $3	145	1100	5455	1319	935	442	0		Voluntary low case $3	145	1100	5455	1319	935	442	0
Voluntary mid case $7.8	145	1100	5455	1319	935	442	0		Voluntary mid case $7.8	145	1100	5455	1319	935	442	0		Voluntary mid case $7.8	145	1100	5455	1319	935	442	0		Voluntary mid case $7.8	145	1100	5455	1319	935	442	0
Voluntary high case $15	145	1100	5455	1319	935	442	1377		Voluntary high case $15	145	1100	5455	1319	935	442	0		Voluntary high case $15	145	1100	5455	1319	935	442	0		Voluntary high case $15	145	1100	5455	1319	935	442	1377
Full compliance $30	145	1100	5455	1319	935	442	2696		Full compliance $30	145	1100	5455	1319	935	442	1377		Full compliance $30	145	1100	5455	1319	935	442	1377		Full compliance $30	145	1100	5455	1319	935	442	2696
Underproductive 50% & 11% Dicount Rate & Upfront Payment									Underproductive 50% & 5% Dicount Rate & Upfront Payment									Underproductive 50% & 8% Dicount Rate & Upfront Payment									Underproductive 50% & 14% Dicount Rate & Upfront Payment
Hectares per class of MgC within the MEDIUM SUITABILITY CLASS (U50%) suitability classess									Hectares per class of MgC within the MEDIUM SUITABILITY CLASS (U50%) suitability classess									Hectares per class of MgC within the MEDIUM SUITABILITY CLASS (U50%) suitability classess									Hectares per class of MgC within the MEDIUM SUITABILITY CLASS (U50%) suitability classess
Carbon pricing mechansim	25 MgC	75 MgC	150 MgC	250 MgC	350 MgC	450 MgC	REDD+ NPV higher		Carbon pricing mechansim	25 MgC	75 MgC	150 MgC	250 MgC	350 MgC	450 MgC	REDD+ NPV higher		Carbon pricing mechansim	25 MgC	75 MgC	150 MgC	250 MgC	350 MgC	450 MgC	REDD+ NPV higher		Carbon pricing mechansim	25 MgC	75 MgC	150 MgC	250 MgC	350 MgC	450 MgC	REDD+ NPV higher
Voluntary low case $3	1422.9	483	2011	359	31.9	52	83.9		Voluntary low case $3	1422.9	483	2011	359	31.9	52	0		Voluntary low case $3	1422.9	483	2011	359	31.9	52	0		Voluntary low case $3	1422.9	483	2011	359	31.9	52	442.9
Voluntary mid case $7.8	1422.9	483	2011	359	31.9	52	2453.9		Voluntary mid case $7.8	1422.9	483	2011	359	31.9	52	83.9		Voluntary mid case $7.8	1422.9	483	2011	359	31.9	52	442.9		Voluntary mid case $7.8	1422.9	483	2011	359	31.9	52	2453.9
Voluntary high case $15	1422.9	483	2011	359	31.9	52	2453.9		Voluntary high case $15	1422.9	483	2011	359	31.9	52	442.9		Voluntary high case $15	1422.9	483	2011	359	31.9	52	2453.9		Voluntary high case $15	1422.9	483	2011	359	31.9	52	2936.9
Full compliance $30	1422.9	483	2011	359	31.9	52	2936.9		Full compliance $30	1422.9	483	2011	359	31.9	52	2453.9		Full compliance $30	1422.9	483	2011	359	31.9	52	2936.9		Full compliance $30	1422.9	483	2011	359	31.9	52	2936.9
Underproductive <25% & 11% Dicount Rate & Upfront Payment									Underproductive <25% & 5% Dicount Rate & Upfront Payment									Underproductive <25% & 8% Dicount Rate & Upfront Payment									Underproductive <25% & 14% Dicount Rate & Upfront Payment
Hectares per class of MgC within the LOW SUITABILITY CLASS (U25%) suitability classess									Hectares per class of MgC within the LOW SUITABILITY CLASS (U25%) suitability classess									Hectares per class of MgC within the LOW SUITABILITY CLASS (U25%) suitability classess									Hectares per class of MgC within the LOW SUITABILITY CLASS (U25%) suitability classess
Carbon pricing mechansim	25 MgC	75 MgC	150 MgC	250 MgC	350 MgC	450 MgC	REDD+ NPV higher		Carbon pricing mechansim	25 MgC	75 MgC	150 MgC	250 MgC	350 MgC	450 MgC	REDD+ NPV higher		Carbon pricing mechansim	25 MgC	75 MgC	150 MgC	250 MgC	350 MgC	450 MgC	REDD+ NPV higher		Carbon pricing mechansim	25 MgC	75 MgC	150 MgC	250 MgC	350 MgC	450 MgC	REDD+ NPV higher
Voluntary low case $3	2754	2426	7922	2199	874.6	369.9	16545.5		Voluntary low case $3	2754	2426	7922	2199	874.6	369.9	16545.5		Voluntary low case $3	2754	2426	7922	2199	874.6	369.9	16545.5		Voluntary low case $3	2754	2426	7922	2199	874.6	369.9	16545.5
Voluntary mid case $7.8	2754	2426	7922	2199	874.6	369.9	16545.5		Voluntary mid case $7.8	2754	2426	7922	2199	874.6	369.9	16545.5		Voluntary mid case $7.8	2754	2426	7922	2199	874.6	369.9	16545.5		Voluntary mid case $7.8	2754	2426	7922	2199	874.6	369.9	16545.5
Voluntary high case $15	2754	2426	7922	2199	874.6	369.9	16545.5		Voluntary high case $15	2754	2426	7922	2199	874.6	369.9	16545.5		Voluntary high case $15	2754	2426	7922	2199	874.6	369.9	16545.5		Voluntary high case $15	2754	2426	7922	2199	874.6	369.9	16545.5
Full compliance $30	2754	2426	7922	2199	874.6	369.9	16545.5		Full compliance $30	2754	2426	7922	2199	874.6	369.9	16545.5		Full compliance $30	2754	2426	7922	2199	874.6	369.9	16545.5		Full compliance $30	2754	2426	7922	2199	874.6	369.9	16545.5
11% Dicount Rate & Upfront Payment	No. ha								5% Dicount Rate & Upfront Payment	No. ha								8% Dicount Rate & Upfront Payment	No. ha								14% Dicount Rate & Upfront Payment	No. ha
Voluntary low case $3	16629.4								Voluntary low case $3	16545.5								Voluntary low case $3	16545.5								Voluntary low case $3	16988.4
Voluntary mid case $7.8	18999.4								Voluntary mid case $7.8	16629.4								Voluntary mid case $7.8	16988.4								Voluntary mid case $7.8	18999.4
Voluntary high case $15	20376.4								Voluntary high case $15	16988.4								Voluntary high case $15	18999.4								Voluntary high case $15	20859.4
Full compliance $30	22178.4								Full compliance $30	20376.4								Full compliance $30	20859.4								Full compliance $30	22178.4
CARBON CALCULATIONS FOR STAGGERED PAYMENT
Full stand									Full stand									Full stand									Full stand
Hectares per class of MgC within the HIGH SUITABILITY CLASS (Full stand) suitability classess									Hectares per class of MgC within the MEDIUM SUITABILITY CLASS (U50%) suitability classess									Hectares per class of MgC within the MEDIUM SUITABILITY CLASS (U50%) suitability classess									Hectares per class of MgC within the MEDIUM SUITABILITY CLASS (U50%) suitability classess
Carbon pricing mechansim	25 MgC	75 MgC	150 MgC	250 MgC	350 MgC	450 MgC	REDD+ NPV higher		Carbon pricing mechansim	25 MgC	75 MgC	150 MgC	250 MgC	350 MgC	450 MgC	REDD+ NPV higher		Carbon pricing mechansim	25 MgC	75 MgC	150 MgC	250 MgC	350 MgC	450 MgC	REDD+ NPV higher		Carbon pricing mechansim	25 MgC	75 MgC	150 MgC	250 MgC	350 MgC	450 MgC	REDD+ NPV higher
Voluntary low case $3	145	1100	5455	1319	935	442	0		Voluntary low case $3	145	1100	5455	1319	935	442	1377		Voluntary low case $3	145	1100	5455	1319	935	442	0		Voluntary low case $3	145	1100	5455	1319	935	442	0
Voluntary mid case $7.8	145	1100	5455	1319	935	442	0		Voluntary mid case $7.8	145	1100	5455	1319	935	442	8151		Voluntary mid case $7.8	145	1100	5455	1319	935	442	0		Voluntary mid case $7.8	145	1100	5455	1319	935	442	0
Voluntary high case $15	145	1100	5455	1319	935	442	0		Voluntary high case $15	145	1100	5455	1319	935	442	8151		Voluntary high case $15	145	1100	5455	1319	935	442	0		Voluntary high case $15	145	1100	5455	1319	935	442	442
Full compliance $30	145	1100	5455	1319	935	442	1377		Full compliance $30	145	1100	5455	1319	935	442	9251		Full compliance $30	145	1100	5455	1319	935	442	1377		Full compliance $30	145	1100	5455	1319	935	442	2696
Underproductive 50%									Underproductive 50%									Underproductive 50%									Underproductive 50%
Hectares per class of MgC within the MEDIUM SUITABILITY CLASS (U50%) suitability classess									Hectares per class of MgC within the MEDIUM SUITABILITY CLASS (U50%) suitability classess									Hectares per class of MgC within the MEDIUM SUITABILITY CLASS (U50%) suitability classess									Hectares per class of MgC within the MEDIUM SUITABILITY CLASS (U50%) suitability classess
Carbon pricing mechansim	25 MgC	75 MgC	150 MgC	250 MgC	350 MgC	450 MgC	REDD+ NPV higher		Carbon pricing mechansim	25 MgC	75 MgC	150 MgC	250 MgC	350 MgC	450 MgC	REDD+ NPV higher		Carbon pricing mechansim	25 MgC	75 MgC	150 MgC	250 MgC	350 MgC	450 MgC	REDD+ NPV higher		Carbon pricing mechansim	25 MgC	75 MgC	150 MgC	250 MgC	350 MgC	450 MgC	REDD+ NPV higher
Voluntary low case $3	1422.9	483	2011	359	31.9	52	0		Voluntary low case $3	1422.9	483	2011	359	31.9	52	0		Voluntary low case $3	1422.9	483	2011	359	31.9	52	0		Voluntary low case $3	1422.9	483	2011	359	31.9	52	83.9
Voluntary mid case $7.8	1422.9	483	2011	359	31.9	52	83.9		Voluntary mid case $7.8	1422.9	483	2011	359	31.9	52	52		Voluntary mid case $7.8	1422.9	483	2011	359	31.9	52	83.9		Voluntary mid case $7.8	1422.9	483	2011	359	31.9	52	2453.9
Voluntary high case $15	1422.9	483	2011	359	31.9	52	2453.9		Voluntary high case $15	1422.9	483	2011	359	31.9	52	442.9		Voluntary high case $15	1422.9	483	2011	359	31.9	52	442.9		Voluntary high case $15	1422.9	483	2011	359	31.9	52	2453.9
Full compliance $30	1422.9	483	2011	359	31.9	52	2936.9		Full compliance $30	1422.9	483	2011	359	31.9	52	2453.9		Full compliance $30	1422.9	483	2011	359	31.9	52	2453.9		Full compliance $30	1422.9	483	2011	359	31.9	52	2936.9
Underproductive <25%									Underproductive <25%									Underproductive <25%									Underproductive <25%
Hectares per class of MgC within the LOW SUITABILITY CLASS (U25%) suitability classess									Hectares per class of MgC within the LOW SUITABILITY CLASS (U25%) suitability classess									Hectares per class of MgC within the LOW SUITABILITY CLASS (U25%) suitability classess									Hectares per class of MgC within the LOW SUITABILITY CLASS (U25%) suitability classess
Carbon pricing mechansim	25 MgC	75 MgC	150 MgC	250 MgC	350 MgC	450 MgC	REDD+ NPV higher		Carbon pricing mechansim	25 MgC	75 MgC	150 MgC	250 MgC	350 MgC	450 MgC	REDD+ NPV higher		Carbon pricing mechansim	25 MgC	75 MgC	150 MgC	250 MgC	350 MgC	450 MgC	REDD+ NPV higher		Carbon pricing mechansim	25 MgC	75 MgC	150 MgC	250 MgC	350 MgC	450 MgC	REDD+ NPV higher
Voluntary low case $3	2754	2426	7922	2199	874.6	369.9	16545.5		Voluntary low case $3	2754	2426	7922	2199	874.6	369.9	16545.5		Voluntary low case $3	2754	2426	7922	2199	874.6	369.9	16545.5		Voluntary low case $3	2754	2426	7922	2199	874.6	369.9	16545.5
Voluntary mid case $7.8	2754	2426	7922	2199	874.6	369.9	16545.5		Voluntary mid case $7.8	2754	2426	7922	2199	874.6	369.9	16545.5		Voluntary mid case $7.8	2754	2426	7922	2199	874.6	369.9	16545.5		Voluntary mid case $7.8	2754	2426	7922	2199	874.6	369.9	16545.5
Voluntary high case $15	2754	2426	7922	2199	874.6	369.9	16545.5		Voluntary high case $15	2754	2426	7922	2199	874.6	369.9	16545.5		Voluntary high case $15	2754	2426	7922	2199	874.6	369.9	16545.5		Voluntary high case $15	2754	2426	7922	2199	874.6	369.9	16545.5
Full compliance $30	2754	2426	7922	2199	874.6	369.9	16545.5		Full compliance $30	2754	2426	7922	2199	874.6	369.9	16545.5		Full compliance $30	2754	2426	7922	2199	874.6	369.9	16545.5		Full compliance $30	2754	2426	7922	2199	874.6	369.9	16545.5
11% Dicount Rate & Staggered Payment	No. ha								5% Dicount Rate & Staggered Payment	No. ha								8% Dicount Rate & Staggered Payment	No. ha								14% Dicount Rate & Staggered Payment	No. ha
Voluntary low case $3	16545.5								Voluntary low case $3	17922.5								Voluntary low case $3	16545.5								Voluntary low case $3	16629.4
Voluntary mid case $7.8	16629.4								Voluntary mid case $7.8	24748.5								Voluntary mid case $7.8	16629.4								Voluntary mid case $7.8	18999.4
Voluntary high case $15	18999.4								Voluntary high case $15	25139.4								Voluntary high case $15	16988.4								Voluntary high case $15	19441.4
Full compliance $30	20859.4								Full compliance $30	28250.4								Full compliance $30	20376.4								Full compliance $30	22178.4
CALCULATING THE TOTAL MgC per payment scenario for Table 4
CARBON CALCULATIONS FOR UPFRONT PAYMENT
Full stand & 11% Dicount Rate & Upfront Payment									Full stand & 5% Dicount Rate & Upfront Payment									Full stand & 8% Dicount Rate & Upfront Payment									Full stand & 14% Dicount Rate & Upfront Payment
Hectares per class of MgC within the HIGH SUITABILITY CLASS (Full stand) suitability classess									Hectares per class of MgC within the MEDIUM SUITABILITY CLASS (U50%) suitability classess									Hectares per class of MgC within the MEDIUM SUITABILITY CLASS (U50%) suitability classess									Hectares per class of MgC within the MEDIUM SUITABILITY CLASS (U50%) suitability classess
Carbon pricing mechansim	25 MgC	75 MgC	150 MgC	250 MgC	350 MgC	450 MgC	REDD+ NPV higher		Carbon pricing mechansim	25 MgC	75 MgC	150 MgC	250 MgC	350 MgC	450 MgC	REDD+ NPV higher		Carbon pricing mechansim	25 MgC	75 MgC	150 MgC	250 MgC	350 MgC	450 MgC	REDD+ NPV higher		Carbon pricing mechansim	25 MgC	75 MgC	150 MgC	250 MgC	350 MgC	450 MgC	REDD+ NPV higher
Voluntary low case $3	3625	82500	818250	329750	327250	198900	0		Voluntary low case $3	3625	82500	818250	329750	327250	198900	0		Voluntary low case $3	3625	82500	818250	329750	327250	198900	0		Voluntary low case $3	3625	82500	818250	329750	327250	198900	0
Voluntary mid case $7.8	3625	82500	818250	329750	327250	198900	0		Voluntary mid case $7.8	3625	82500	818250	329750	327250	198900	0		Voluntary mid case $7.8	3625	82500	818250	329750	327250	198900	0		Voluntary mid case $7.8	3625	82500	818250	329750	327250	198900	0
Voluntary high case $15	3625	82500	818250	329750	327250	198900	526150		Voluntary high case $15	3625	82500	818250	329750	327250	198900	0		Voluntary high case $15	3625	82500	818250	329750	327250	198900	0		Voluntary high case $15	3625	82500	818250	329750	327250	198900	526150
Full compliance $30	3625	82500	818250	329750	327250	198900	855900		Full compliance $30	3625	82500	818250	329750	327250	198900	526150		Full compliance $30	3625	82500	818250	329750	327250	198900	526150		Full compliance $30	3625	82500	818250	329750	327250	198900	855900
Underproductive 50% & 11% Dicount Rate & Upfront Payment									Underproductive 50% & 5% Dicount Rate & Upfront Payment									Underproductive 50% & 8% Dicount Rate & Upfront Payment									Underproductive 50% & 14% Dicount Rate & Upfront Payment
Hectares per class of MgC within the MEDIUM SUITABILITY CLASS (U50%) suitability classess									Hectares per class of MgC within the MEDIUM SUITABILITY CLASS (U50%) suitability classess									Hectares per class of MgC within the MEDIUM SUITABILITY CLASS (U50%) suitability classess									Hectares per class of MgC within the MEDIUM SUITABILITY CLASS (U50%) suitability classess
Carbon pricing mechansim	25 MgC	75 MgC	150 MgC	250 MgC	350 MgC	450 MgC	REDD+ NPV higher		Carbon pricing mechansim	25 MgC	75 MgC	150 MgC	250 MgC	350 MgC	450 MgC	REDD+ NPV higher		Carbon pricing mechansim	25 MgC	75 MgC	150 MgC	250 MgC	350 MgC	450 MgC	REDD+ NPV higher		Carbon pricing mechansim	25 MgC	75 MgC	150 MgC	250 MgC	350 MgC	450 MgC	REDD+ NPV higher
Voluntary low case $3	35572.5	36225	301650	89750	11165	23400	34565		Voluntary low case $3	35572.5	36225	301650	89750	11165	23400	0		Voluntary low case $3	35572.5	36225	301650	89750	11165	23400	0		Voluntary low case $3	35572.5	36225	301650	89750	11165	23400	124315
Voluntary mid case $7.8	35572.5	36225	301650	89750	11165	23400	425965		Voluntary mid case $7.8	35572.5	36225	301650	89750	11165	23400	34565		Voluntary mid case $7.8	35572.5	36225	301650	89750	11165	23400	124315		Voluntary mid case $7.8	35572.5	36225	301650	89750	11165	23400	425965
Voluntary high case $15	35572.5	36225	301650	89750	11165	23400	425965		Voluntary high case $15	35572.5	36225	301650	89750	11165	23400	124315		Voluntary high case $15	35572.5	36225	301650	89750	11165	23400	425965		Voluntary high case $15	35572.5	36225	301650	89750	11165	23400	462190
Full compliance $30	35572.5	36225	301650	89750	11165	23400	462190		Full compliance $30	35572.5	36225	301650	89750	11165	23400	425965		Full compliance $30	35572.5	36225	301650	89750	11165	23400	462190		Full compliance $30	35572.5	36225	301650	89750	11165	23400	462190
Underproductive <25% & 11% Dicount Rate & Upfront Payment									Underproductive <25% & 5% Dicount Rate & Upfront Payment									Underproductive <25% & 8% Dicount Rate & Upfront Payment									Underproductive <25% & 14% Dicount Rate & Upfront Payment
Hectares per class of MgC within the LOW SUITABILITY CLASS (U25%) suitability classess									Hectares per class of MgC within the LOW SUITABILITY CLASS (U25%) suitability classess									Hectares per class of MgC within the LOW SUITABILITY CLASS (U25%) suitability classess									Hectares per class of MgC within the LOW SUITABILITY CLASS (U25%) suitability classess
Carbon pricing mechansim	25 MgC	75 MgC	150 MgC	250 MgC	350 MgC	450 MgC	REDD+ NPV higher		Carbon pricing mechansim	25 MgC	75 MgC	150 MgC	250 MgC	350 MgC	450 MgC	REDD+ NPV higher		Carbon pricing mechansim	25 MgC	75 MgC	150 MgC	250 MgC	350 MgC	450 MgC	REDD+ NPV higher		Carbon pricing mechansim	25 MgC	75 MgC	150 MgC	250 MgC	350 MgC	450 MgC	REDD+ NPV higher
Voluntary low case $3	68850	181950	1188300	549750	306110	166455	2461415		Voluntary low case $3	68850	181950	1188300	549750	306110	166455	2461415		Voluntary low case $3	68850	181950	1188300	549750	306110	166455	2461415		Voluntary low case $3	68850	181950	1188300	549750	306110	166455	2461415
Voluntary mid case $7.8	68850	181950	1188300	549750	306110	166455	2461415		Voluntary mid case $7.8	68850	181950	1188300	549750	306110	166455	2461415		Voluntary mid case $7.8	68850	181950	1188300	549750	306110	166455	2461415		Voluntary mid case $7.8	68850	181950	1188300	549750	306110	166455	2461415
Voluntary high case $15	68850	181950	1188300	549750	306110	166455	2461415		Voluntary high case $15	68850	181950	1188300	549750	306110	166455	2461415		Voluntary high case $15	68850	181950	1188300	549750	306110	166455	2461415		Voluntary high case $15	68850	181950	1188300	549750	306110	166455	2461415
Full compliance $30	68850	181950	1188300	549750	306110	166455	2461415		Full compliance $30	68850	181950	1188300	549750	306110	166455	2461415		Full compliance $30	68850	181950	1188300	549750	306110	166455	2461415		Full compliance $30	68850	181950	1188300	549750	306110	166455	2461415
11% Dicount Rate & Upfront Payment	MgC								5% Dicount Rate & Upfront Payment	No. ha								8% Dicount Rate & Upfront Payment	No. ha								14% Dicount Rate & Upfront Payment	No. ha
Voluntary low case $3	2495980								Voluntary low case $3	2461415								Voluntary low case $3	2461415								Voluntary low case $3	2585730
Voluntary mid case $7.8	2887380								Voluntary mid case $7.8	2495980								Voluntary mid case $7.8	2585730								Voluntary mid case $7.8	2887380
Voluntary high case $15	3413530								Voluntary high case $15	2585730								Voluntary high case $15	2887380								Voluntary high case $15	3449755
Full compliance $30	3779505								Full compliance $30	3413530								Full compliance $30	3449755								Full compliance $30	3779505
CARBON CALCULATIONS FOR STAGGERED PAYMENT
Full stand									Full stand									Full stand									Full stand
Hectares per class of MgC within the HIGH SUITABILITY CLASS (Full stand) suitability classess									Hectares per class of MgC within the MEDIUM SUITABILITY CLASS (U50%) suitability classess									Hectares per class of MgC within the MEDIUM SUITABILITY CLASS (U50%) suitability classess									Hectares per class of MgC within the MEDIUM SUITABILITY CLASS (U50%) suitability classess
Carbon pricing mechansim	25 MgC	75 MgC	150 MgC	250 MgC	350 MgC	450 MgC	REDD+ NPV higher		Carbon pricing mechansim	25 MgC	75 MgC	150 MgC	250 MgC	350 MgC	450 MgC	REDD+ NPV higher		Carbon pricing mechansim	25 MgC	75 MgC	150 MgC	250 MgC	350 MgC	450 MgC	REDD+ NPV higher		Carbon pricing mechansim	25 MgC	75 MgC	150 MgC	250 MgC	350 MgC	450 MgC	REDD+ NPV higher
Voluntary low case $3	3625	82500	818250	329750	327250	198900	0		Voluntary low case $3	3625	82500	818250	329750	327250	198900	526150		Voluntary low case $3	3625	82500	818250	329750	327250	198900	0		Voluntary low case $3	3625	82500	818250	329750	327250	198900	0
Voluntary mid case $7.8	3625	82500	818250	329750	327250	198900	0		Voluntary mid case $7.8	3625	82500	818250	329750	327250	198900	1674150		Voluntary mid case $7.8	3625	82500	818250	329750	327250	198900	0		Voluntary mid case $7.8	3625	82500	818250	329750	327250	198900	0
Voluntary high case $15	3625	82500	818250	329750	327250	198900	0		Voluntary high case $15	3625	82500	818250	329750	327250	198900	1674150		Voluntary high case $15	3625	82500	818250	329750	327250	198900	0		Voluntary high case $15	3625	82500	818250	329750	327250	198900	198900
Full compliance $30	3625	82500	818250	329750	327250	198900	526150		Full compliance $30	3625	82500	818250	329750	327250	198900	1756650		Full compliance $30	3625	82500	818250	329750	327250	198900	526150		Full compliance $30	3625	82500	818250	329750	327250	198900	855900
Underproductive 50%									Underproductive 50%									Underproductive 50%									Underproductive 50%
Hectares per class of MgC within the MEDIUM SUITABILITY CLASS (U50%) suitability classess									Hectares per class of MgC within the MEDIUM SUITABILITY CLASS (U50%) suitability classess									Hectares per class of MgC within the MEDIUM SUITABILITY CLASS (U50%) suitability classess									Hectares per class of MgC within the MEDIUM SUITABILITY CLASS (U50%) suitability classess
Carbon pricing mechansim	25 MgC	75 MgC	150 MgC	250 MgC	350 MgC	450 MgC	REDD+ NPV higher		Carbon pricing mechansim	25 MgC	75 MgC	150 MgC	250 MgC	350 MgC	450 MgC	REDD+ NPV higher		Carbon pricing mechansim	25 MgC	75 MgC	150 MgC	250 MgC	350 MgC	450 MgC	REDD+ NPV higher		Carbon pricing mechansim	25 MgC	75 MgC	150 MgC	250 MgC	350 MgC	450 MgC	REDD+ NPV higher
Voluntary low case $3	35572.5	36225	301650	89750	11165	23400	0		Voluntary low case $3	35572.5	36225	301650	89750	11165	23400	0		Voluntary low case $3	35572.5	36225	301650	89750	11165	23400	0		Voluntary low case $3	35572.5	36225	301650	89750	11165	23400	34565
Voluntary mid case $7.8	35572.5	36225	301650	89750	11165	23400	34565		Voluntary mid case $7.8	1422.9	36225	301650	89750	11165	23400	23400		Voluntary mid case $7.8	1422.9	36225	301650	89750	11165	23400	34565		Voluntary mid case $7.8	35572.5	36225	301650	89750	11165	23400	425965
Voluntary high case $15	35572.5	36225	301650	89750	11165	23400	425965		Voluntary high case $15	1422.9	36225	301650	89750	11165	23400	124315		Voluntary high case $15	1422.9	36225	301650	89750	11165	23400	124315		Voluntary high case $15	35572.5	36225	301650	89750	11165	23400	425965
Full compliance $30	35572.5	36225	301650	89750	11165	23400	462190		Full compliance $30	1422.9	36225	301650	89750	11165	23400	425965		Full compliance $30	1422.9	36225	301650	89750	11165	23400	425965		Full compliance $30	35572.5	36225	301650	89750	11165	23400	462190
Underproductive <25%									Underproductive <25%									Underproductive <25%									Underproductive <25%
Hectares per class of MgC within the LOW SUITABILITY CLASS (U25%) suitability classess									Hectares per class of MgC within the LOW SUITABILITY CLASS (U25%) suitability classess									Hectares per class of MgC within the LOW SUITABILITY CLASS (U25%) suitability classess									Hectares per class of MgC within the LOW SUITABILITY CLASS (U25%) suitability classess
Carbon pricing mechansim	25 MgC	75 MgC	150 MgC	250 MgC	350 MgC	450 MgC	REDD+ NPV higher		Carbon pricing mechansim	25 MgC	75 MgC	150 MgC	250 MgC	350 MgC	450 MgC	REDD+ NPV higher		Carbon pricing mechansim	25 MgC	75 MgC	150 MgC	250 MgC	350 MgC	450 MgC	REDD+ NPV higher		Carbon pricing mechansim	25 MgC	75 MgC	150 MgC	250 MgC	350 MgC	450 MgC	REDD+ NPV higher
Voluntary low case $3	68850	181950	1188300	549750	306110	166455	2461415		Voluntary low case $3	68850	181950	1188300	549750	306110	166455	2461415		Voluntary low case $3	68850	181950	1188300	549750	306110	166455	2461415		Voluntary low case $3	68850	181950	1188300	549750	306110	166455	2461415
Voluntary mid case $7.8	68850	181950	1188300	549750	306110	166455	2461415		Voluntary mid case $7.8	68850	181950	1188300	549750	306110	166455	2461415		Voluntary mid case $7.8	68850	181950	1188300	549750	306110	166455	2461415		Voluntary mid case $7.8	68850	181950	1188300	549750	306110	166455	2461415
Voluntary high case $15	68850	181950	1188300	549750	306110	166455	2461415		Voluntary high case $15	68850	181950	1188300	549750	306110	166455	2461415		Voluntary high case $15	68850	181950	1188300	549750	306110	166455	2461415		Voluntary high case $15	68850	181950	1188300	549750	306110	166455	2461415
Full compliance $30	68850	181950	1188300	549750	306110	166455	2461415		Full compliance $30	68850	181950	1188300	549750	306110	166455	2461415		Full compliance $30	68850	181950	1188300	549750	306110	166455	2461415		Full compliance $30	68850	181950	1188300	549750	306110	166455	2461415
11% Dicount Rate & Staggered Payment	No. ha								5% Dicount Rate & Staggered Payment	No. ha								8% Dicount Rate & Staggered Payment	No. ha								14% Dicount Rate & Staggered Payment	No. ha
Voluntary low case $3	2461415								Voluntary low case $3	2987565								Voluntary low case $3	2461415								Voluntary low case $3	2495980
Voluntary mid case $7.8	2495980								Voluntary mid case $7.8	4158965								Voluntary mid case $7.8	2495980								Voluntary mid case $7.8	2887380
Voluntary high case $15	2887380								Voluntary high case $15	4259880								Voluntary high case $15	2585730								Voluntary high case $15	3086280
Full compliance $30	3449755								Full compliance $30	4644030								Full compliance $30	3413530								Full compliance $30	3779505
