# Supplementary material for: Identifying Where REDD+ Financially Out-Competes Oil Palm in Floodplain Landscapes Using a Fine-Scale Approach
Source: PLoS One. 2016 Jun 8;11(6):e0156481. doi: 10.1371/journal.pone.0156481 (PMC4898686; doi:10.1371/journal.pone.0156481)
Supplement: S2 File — Table A Full stand at 100% palm capacity, annually discounted at 11%; Table B Underproductive at 50% at 50% palm capacity, annually discounted at 11%; Table C Underproductive at ≤25% at 25% palm capacity, annually discounted at 11%. (XLSX) [file pone.0156481.s002.xlsx]

## Sheet: SI
Supporting Information
File S2: Oil palm new planting economic models
REDD+ financially out-competes oil palm cultivation in floodplain forest systems in Borneo
Nicola K. Abram*; Douglas C. MacMillan; Panteleimon Xofis; Marc Ancrenaz; Joseph Tzanopoulos; Robert Ong; Lian Pin Koh; Benoit Goossens; Christian Del Valle; Lucy Peter; Alexandra C Morel; Isabelle Lackman; Robin Chung; Harjinder Kler; Laurentius Ambu; William Baya; Andrew T. Knight.
*Corresponding author (nicola_abram@hotmail.com)

## Sheet: Table S2A Full Stand
COST OF PRODUCTION:
Buisness-as-Usual with FULL STAND (135 palms per hectare)
Discount rate			0.11
Conversion rate US$1 = RM3.2 (Malaysian Ringgit)			3.2
Cropping life (years)			25
Table S2A Full stand at 100% palm capacity, annually discounted at 11%.
			Planted out			Young mature				Mature													Old Mature
Year, After Planting			0	1	2	3	4	5	6	7	8	9	10	11	12	13	14	15	16	17	18	19	20	21	22	23	24
Theoretical years	0		2011	2012	2013	2014	2015	2016	2017	2018	2019	2020	2021	2022	2023	2024	2025	2026	2027	2028	2029	2030	2031	2032	2033	2034	2035
REVENUE
(1) Projected Yield, t/FFB/ha	Full stand		0	0	6	16	21	24.5	27	28	30	30	30	30	29.5	28.5	27.5	26.5	26	24.5	23.5	22.5	21.5	20.5	19.5	18.5	17
(2) Price, RM/tFFB (2011price RM535 t/FFB)		535	0	0	535	535	535	535	535	535	535	535	535	535	535	535	535	535	535	535	535	535	535	535	535	535	535
(3) Income (1)*(2), at RM/ha			0	0	3210	8560	11235	13107.5	14445	14980	16050	16050	16050	16050	15782.5	15247.5	14712.5	14177.5	13910	13107.5	12572.5	12037.5	11502.5	10967.5	10432.5	9897.5	9095
OPPERATION COSTS
(4) Non-recurrent costs for New Plantings (RM/ha)			3887.36	0	0	0	0	0	0	0	0	0	0	0	0	0	0	0	0	0	0	0	0	0	0	0	1
(5) General Charges (or Joint estate costs), RM/ha			650	650	650	650	650	650	650	650	650	650	650	650	650	650	650	650	650	650	650	650	650	650	650	650	650
(6) Field Upkeep, RM/ha
Weeding/Lallang			450	250	200	200	180	150	150	150	150	150	150	150	150	150	150	150	150	150	150	150	150	150	150	150	150
Manuring (or Fertiliser, Application, Foliar analysis)			500	1000	1800	1800	1800	1800	1800	1800	1800	1800	1800	1800	1800	1800	1800	1800	1800	1800	1800	1800	1800	1800	1800	1800	1800
Pruning			15	15	30	30	30	30	30	30	30	30	30	30	30	30	30	30	30	30	30	37.5	37.5	37.5	37.5	37.5	37.5
Pests & Diseases			30	15	5	5	5	5	5	5	5	5	5	5	5	5	5	5	5	5	5	5	5	5	5	5	5
Census/Survey/Supplying			150	50	10	10	10	10	10	10	10	10	10	10	10	10	10	10	10	10	10	10	10	10	10	10	10
Roads, Bridges, Paths, Drains			200	200	200	200	200	200	200	200	200	200	200	200	200	200	200	200	200	200	200	200	200	200	200	200	200
Soil/Water Conservation			15	15	10	10	10	10	10	10	10	10	10	10	10	10	10	10	10	10	10	10	10	10	10	10	10
Ablation			100	30	25	0	0	0	0	0	0	0	0	0	0	0	0	0	0	0	0	0	0	0	0	0	0
Boundaries and survey/cover crops			188.47	100.48	53.34	0	0	0	0	0	0	0	0	0	0	0	0	0	0	0	0	0	0	0	0	0	0
Mandore wages/direct field supervision			35.98	35.98	35.98	35.98	35.98	35.98	35.98	35.98	35.98	35.98	35.98	35.98	35.98	35.98	35.98	35.98	35.98	35.98	35.98	35.98	35.98	35.98	35.98	35.98	35.98
Tools			2	2	2	2	2	2	2	2	2	2	2	2	2	2	2	2	2	2	2	2	2	2	2	2	2
Miscellaneous/Sundry expenses			20	20	20	20	20	20	20	20	20	20	20	20	20	20	20	20	20	20	20	20	20	20	20	20	20
Total Field Upkeep, RM/ha			1706.45	1733.46	2391.32	2312.98	2292.98	2262.98	2262.98	2262.98	2262.98	2262.98	2262.98	2262.98	2262.98	2262.98	2262.98	2262.98	2262.98	2262.98	2262.98	2270.48	2270.48	2270.48	2270.48	2270.48	2270.48
(7) Harvestingting/Transpt, at RM/tFFB		50	0	0	300	800	1050	1225	1350	1400	1500	1500	1500	1500	1475	1425	1375	1325	1300	1225	1175	1237.5	1118	1066	1014	962	884
(9) Total Costs, (4)+(5)+(6)+(7), (8) RM/ha			6243.81	2383.46	3341.32	3762.98	3992.98	4137.98	4262.98	4312.98	4412.98	4412.98	4412.98	4412.98	4387.98	4337.98	4287.98	4237.98	4212.98	4137.98	4087.98	4157.98	4038.48	3986.48	3934.48	3882.48	3805.48
(10) Net Income (3)-(8), RM/ha			-6243.81	-2383.46	-131.32	4797.02	7242.02	8969.52	10182	10667	11637	11637	11637	11637	11394.5	10909.5	10424.5	9939.52	9697.02	8969.52	8484.52	7879.52	7464.02	6981.02	6498.02	6015.02	5289.52
(11) Capitalised (NPV), RM/ha @		0.11		47480
(12) Reversion Basic Ld Val, RM/ha			42231
(13) Defer Over Cropping Life @	25	0.05	0.267848
(14) Deferred Basic Ld Val, RM/ha				11312
(15) M V (11)+(14), RM/ha				58792
(16) Net Present Value of Oil palm Total for a 25 year period			RM/ha/yr-25	47480
			$/ha yr -25	14837.5
(17) Averaged Net Present Value of Oil Palm per hectare			RM/ha/yr-1	1899.2
			$/ha yr -1	593.5

## Sheet: Table S2B Underproductive 50%
COST OF PRODUCTION:
Buisness-as-Usual with FULL STAND (135 palms per hectare)
Discount rate			0.11
Conversion rate US$1 = RM3.2 (Malaysian Ringgit)			3.2
Cropping life (years)			25
Table S2B Underproductive at 50% at 50% palm capacity, annually discounted at 11%.
			Planted out			Young mature				Mature													Old Mature
Year, After Planting			0	1	2	3	4	5	6	7	8	9	10	11	12	13	14	15	16	17	18	19	20	21	22	23	24
	0		2011	2012	2013	2014	2015	2016	2017	2018	2019	2020	2021	2022	2023	2024	2025	2026	2027	2028	2029	2030	2031	2032	2033	2034	2035
REVENUE
(1) Projected Yield, t/FFB/ha	Underproductive at 50%		0	0	3	8	10.5	12.25	13.5	14	15	15	15	15	14.75	14.25	13.75	13.25	13	12.25	11.75	11.25	10.75	10.25	9.75	9.25	8.5
(2) Price, RM/tFFB (2011price RM535 t/FFB) + Premium		535	0	0	535	535	535	535	535	535	535	535	535	535	535	535	535	535	535	535	535	535	535	535	535	535	535
(3) Income (1)*(2), at RM/ha			0	0	1605	4280	5617.5	6553.75	7222.5	7490	8025	8025	8025	8025	7891.25	7623.75	7356.25	7088.75	6955	6553.75	6286.25	6018.75	5751.25	5483.75	5216.25	4948.75	4547.5
OPPERATION COSTS
(4) Non-recurrent costs for New Plantings (RM/ha)			3887.36	0	0	0	0	0	0	0	0	0	0	0	0	0	0	0	0	0	0	0	0	0	0	0	1
(5) General Charges (or Joint estate costs), RM/ha			650	650	650	650	650	650	650	650	650	650	650	650	650	650	650	650	650	650	650	650	650	650	650	650	650
(6) Field Upkeep, RM/ha
Weeding/Lallang			450	250	200	200	180	150	150	150	150	150	150	150	150	150	150	150	150	150	150	150	150	150	150	150	150
Manuring (or Fertiliser, Application, Foliar analysis)			500	1000	1800	1800	1800	1800	1800	1800	1800	1800	1800	1800	1800	1800	1800	1800	1800	1800	1800	1800	1800	1800	1800	1800	1800
Pruning			15	15	30	30	30	30	30	30	30	30	30	30	30	30	30	30	30	30	30	37.5	37.5	37.5	37.5	37.5	37.5
Pests & Diseases			30	15	5	5	5	5	5	5	5	5	5	5	5	5	5	5	5	5	5	5	5	5	5	5	5
Census/Survey/Supplying			225	75	10	10	10	10	10	10	10	10	10	10	10	10	10	10	10	10	10	10	10	10	10	10	10
Roads, Bridges, Paths, Drains			200	200	200	200	200	200	200	200	200	200	200	200	200	200	200	200	200	200	200	200	200	200	200	200	200
Soil/Water Conservation			15	15	10	10	10	10	10	10	10	10	10	10	10	10	10	10	10	10	10	10	10	10	10	10	10
Ablation			100	30	25	0	0	0	0	0	0	0	0	0	0	0	0	0	0	0	0	0	0	0	0	0	0
Boundaries and survey/cover crops			188.47	100.48	53.34	0	0	0	0	0	0	0	0	0	0	0	0	0	0	0	0	0	0	0	0	0	0
Mandore wages/direct field supervision			35.98	35.98	35.98	35.98	35.98	35.98	35.98	35.98	35.98	35.98	35.98	35.98	35.98	35.98	35.98	35.98	35.98	35.98	35.98	35.98	35.98	35.98	35.98	35.98	35.98
Tools			2	2	2	2	2	2	2	2	2	2	2	2	2	2	2	2	2	2	2	2	2	2	2	2	2
Miscellaneous/Sundry expenses			20	20	20	20	20	20	20	20	20	20	20	20	20	20	20	20	20	20	20	20	20	20	20	20	20
Total Field Upkeep, RM/ha			1781.45	1758.46	2391.32	2312.98	2292.98	2262.98	2262.98	2262.98	2262.98	2262.98	2262.98	2262.98	2262.98	2262.98	2262.98	2262.98	2262.98	2262.98	2262.98	2270.48	2270.48	2270.48	2270.48	2270.48	2270.48
(7) Harvestingting/Transpt, at RM/tFFB		50	0	0	150	400	525	612.5	675	700	750	750	750	750	737.5	712.5	687.5	662.5	650	612.5	587.5	618.75	559	533	507	481	442
(9) Total Costs, (4)+(5)+(6)+(7), (8) RM/ha			6318.81	2408.46	3191.32	3362.98	3467.98	3525.48	3587.98	3612.98	3662.98	3662.98	3662.98	3662.98	3650.48	3625.48	3600.48	3575.48	3562.98	3525.48	3500.48	3539.23	3479.48	3453.48	3427.48	3401.48	3363.48
(10) Net Income (3)-(8), RM/ha			-6318.81	-2408.46	-1586.32	917.02	2149.52	3028.27	3634.52	3877.02	4362.02	4362.02	4362.02	4362.02	4240.77	3998.27	3755.77	3513.27	3392.02	3028.27	2785.77	2479.52	2271.77	2030.27	1788.77	1547.27	1184.02
(11) Capitalised (NPV), RM/ha @		0.11		10026
(12) Reversion Basic Ld Val, RM/ha			42231
(13) Defer Over Cropping Life @	25	0.05	0.267848
(14) Deferred Basic Ld Val, RM/ha				11312
(15) M V (11)+(14), RM/ha				21338
(16) Net Present Value of Oil palm Total for a 25 year period			RM/ha/yr-25	10026
			$/ha yr -25	3133.12
(17) Averaged Net Present Value of Oil Palm per hectare			RM/ha/yr-1	401.04
			$/ha yr -1	125.325

## Sheet: Table S2C Underproductive <25%
COST OF PRODUCTION:
Buisness-as-Usual with FULL STAND (135 palms per hectare)
Discount rate			0.11
Conversion rate US$1 = RM3.2 (Malaysian Ringgit)			3.2
Cropping life (years)			25
Table S2C Underproductive at ≤25% at 25% palm capacity, annually discounted at 11%.
			Planted out			Young mature				Mature													Old Mature
Year, After Planting			0	1	2	3	4	5	6	7	8	9	10	11	12	13	14	15	16	17	18	19	20	21	22	23	24
	0		2011	2012	2013	2014	2015	2016	2017	2018	2019	2020	2021	2022	2023	2024	2025	2026	2027	2028	2029	2030	2031	2032	2033	2034	2035
REVENUE
(1) Projected Yield, t/FFB/ha	Underproductive at 25%		0	0	1.5	4	5.25	6.125	6.75	7	7.5	7.5	7.5	7.5	7.375	7.125	6.875	6.625	6.5	6.125	5.875	5.625	5.375	5.125	4.875	4.625	4.25
(2) Price, RM/tFFB (2011price RM535 t/FFB) + Premium		535	0	0	535	535	535	535	535	535	535	535	535	535	535	535	535	535	535	535	535	535	535	535	535	535	535
(3) Income (1)*(2), at RM/ha			0	0	802.5	2140	2808.75	3276.88	3611.25	3745	4012.5	4012.5	4012.5	4012.5	3945.62	3811.88	3678.12	3544.38	3477.5	3276.88	3143.12	3009.38	2875.62	2741.88	2608.12	2474.38	2273.75
OPPERATION COSTS
(4) Non-recurrent costs for New Plantings (RM/ha)			3887.36	0	0	0	0	0	0	0	0	0	0	0	0	0	0	0	0	0	0	0	0	0	0	0	1
(5) General Charges (or Joint estate costs), RM/ha			650	650	650	650	650	650	650	650	650	650	650	650	650	650	650	650	650	650	650	650	650	650	650	650	650
(6) Field Upkeep, RM/ha
Weeding/Lallang			450	250	200	200	180	150	150	150	150	150	150	150	150	150	150	150	150	150	150	150	150	150	150	150	150
Manuring (or Fertiliser, Application, Foliar analysis)			500	1000	1800	1800	1800	1800	1800	1800	1800	1800	1800	1800	1800	1800	1800	1800	1800	1800	1800	1800	1800	1800	1800	1800	1800
Pruning			15	15	30	30	30	30	30	30	30	30	30	30	30	30	30	30	30	30	30	37.5	37.5	37.5	37.5	37.5	37.5
Pests & Diseases			30	15	5	5	5	5	5	5	5	5	5	5	5	5	5	5	5	5	5	5	5	5	5	5	5
Census/Survey/Supplying			262.5	87.5	10	10	10	10	10	10	10	10	10	10	10	10	10	10	10	10	10	10	10	10	10	10	10
Roads, Bridges, Paths, Drains			200	200	200	200	200	200	200	200	200	200	200	200	200	200	200	200	200	200	200	200	200	200	200	200	200
Soil/Water Conservation			15	15	10	10	10	10	10	10	10	10	10	10	10	10	10	10	10	10	10	10	10	10	10	10	10
Ablation			100	30	25	0	0	0	0	0	0	0	0	0	0	0	0	0	0	0	0	0	0	0	0	0	0
Boundaries and survey/cover crops			188.47	100.48	53.34	0	0	0	0	0	0	0	0	0	0	0	0	0	0	0	0	0	0	0	0	0	0
Mandore wages/direct field supervision			35.98	35.98	35.98	35.98	35.98	35.98	35.98	35.98	35.98	35.98	35.98	35.98	35.98	35.98	35.98	35.98	35.98	35.98	35.98	35.98	35.98	35.98	35.98	35.98	35.98
Tools			2	2	2	2	2	2	2	2	2	2	2	2	2	2	2	2	2	2	2	2	2	2	2	2	2
Miscellaneous/Sundry expenses			20	20	20	20	20	20	20	20	20	20	20	20	20	20	20	20	20	20	20	20	20	20	20	20	20
Total Field Upkeep, RM/ha			1818.95	1770.96	2391.32	2312.98	2292.98	2262.98	2262.98	2262.98	2262.98	2262.98	2262.98	2262.98	2262.98	2262.98	2262.98	2262.98	2262.98	2262.98	2262.98	2270.48	2270.48	2270.48	2270.48	2270.48	2270.48
(7) Harvestingting/Transpt, at RM/tFFB		50	0	0	75	200	262.5	306.25	337.5	350	375	375	375	375	368.75	356.25	343.75	331.25	325	306.25	293.75	309.375	279.5	266.5	253.5	240.5	221
(9) Total Costs, (4)+(5)+(6)+(7), (8) RM/ha			6356.31	2420.96	3116.32	3162.98	3205.48	3219.23	3250.48	3262.98	3287.98	3287.98	3287.98	3287.98	3281.73	3269.23	3256.73	3244.23	3237.98	3219.23	3206.73	3229.86	3199.98	3186.98	3173.98	3160.98	3142.48
(10) Net Income (3)-(8), RM/ha			-6356.31	-2420.96	-2313.82	-1022.98	-396.73	57.645	360.77	482.02	724.52	724.52	724.52	724.52	663.895	542.645	421.395	300.145	239.52	57.645	-63.605	-220.48	-324.355	-445.105	-565.855	-686.605	-868.73
(11) Capitalised (NPV), RM/ha @		0.11		-8701
(12) Reversion Basic Ld Val, RM/ha			42231
(13) Defer Over Cropping Life @	25	0.05	0.267848
(14) Deferred Basic Ld Val, RM/ha				11312
(15) M V (11)+(14), RM/ha				2611
(16) Net Present Value of Oil palm Total for a 25 year period			RM/ha/yr-25	-8701
			$/ha yr -25	-2719.06
(17) Averaged Net Present Value of Oil Palm per hectare			RM/ha/yr-1	-348.04
			$/ha yr -1	-108.763
